# Supplementary material for: Myeloid‐Mas Signaling Modulates Pathogenic Crosstalk among MYC+CD63+ Endothelial Cells, MMP12+ Macrophages, and Monocytes in Acetaminophen‐Induced Liver Injury
Source: PubMed Central journal article supplement (PMC11040347; doi:10.1002/advs.202306066), 2024-02-13
Supplement: ADVS-11-2306066-s008.pdf [file ADVS-11-2306066-s008.pdf]

## Supporting Information

for *Adv. Sci.*, DOI 10.1002/adv.202306066

Myeloid-Mas Signaling Modulates Pathogenic Crosstalk among MYC<sup>+</sup>CD63<sup>+</sup> Endothelial Cells, MMP12<sup>+</sup> Macrophages, and Monocytes in Acetaminophen-Induced Liver Injury

*Shuai Chen, Zhi Lu, Yudong Zhao, Lu Xia, Chun Liu, Siqing Zuo, Manchang Jin, Haoyu Jia, Shanshan Li, Shuo Zhang, Bo Yang, Zhijing Wang, Jing Li\*, Fei Wang\* and Changqing Yang\**

**Myeloid-Mas Signaling Modulates Pathogenic Crosstalk among  
MYC<sup>+</sup>CD63<sup>+</sup> Endothelial Cells, MMP12<sup>+</sup> Macrophages and Monocytes in  
Acetaminophen-Induced Liver Injury**

*Shuai Chen, Zhi Lu, Yudong Zhao, Lu Xia, Chun Liu, Siqing Zuo, Manchang Jin, Haoyu Jia, Shanshan Li, Shuo Zhang, Bo Yang, Zhijing Wang, Jing Li\*, Fei Wang\*, Changqing Yang\**

**Table of contents**

|                                               |    |
|-----------------------------------------------|----|
| Supplementary Figures and Figure legends..... | 3  |
| Figure S1.....                                | 3  |
| Figure S2.....                                | 5  |
| Figure S3.....                                | 7  |
| Figure S4.....                                | 9  |
| Figure S5.....                                | 10 |
| Figure S6.....                                | 11 |
| Figure S7.....                                | 12 |
| Figure S8.....                                | 13 |
| Figure S9.....                                | 15 |
| Figure S10.....                               | 18 |
| Figure S11.....                               | 20 |
| Figure S12.....                               | 22 |
| Figure S13.....                               | 24 |
| Figure S14.....                               | 25 |
| Figure S15.....                               | 29 |
| Figure S16.....                               | 30 |
| Figure S17.....                               | 32 |
| Figure S18.....                               | 34 |
| Figure S19.....                               | 35 |
| Figure S20.....                               | 36 |

|                           |    |
|---------------------------|----|
| Figure S21.....           | 38 |
| Figure S22.....           | 41 |
| Figure S23.....           | 44 |
| Supplementary Tables..... | 45 |
| Table S1.....             | 45 |
| Table S2.....             | 46 |

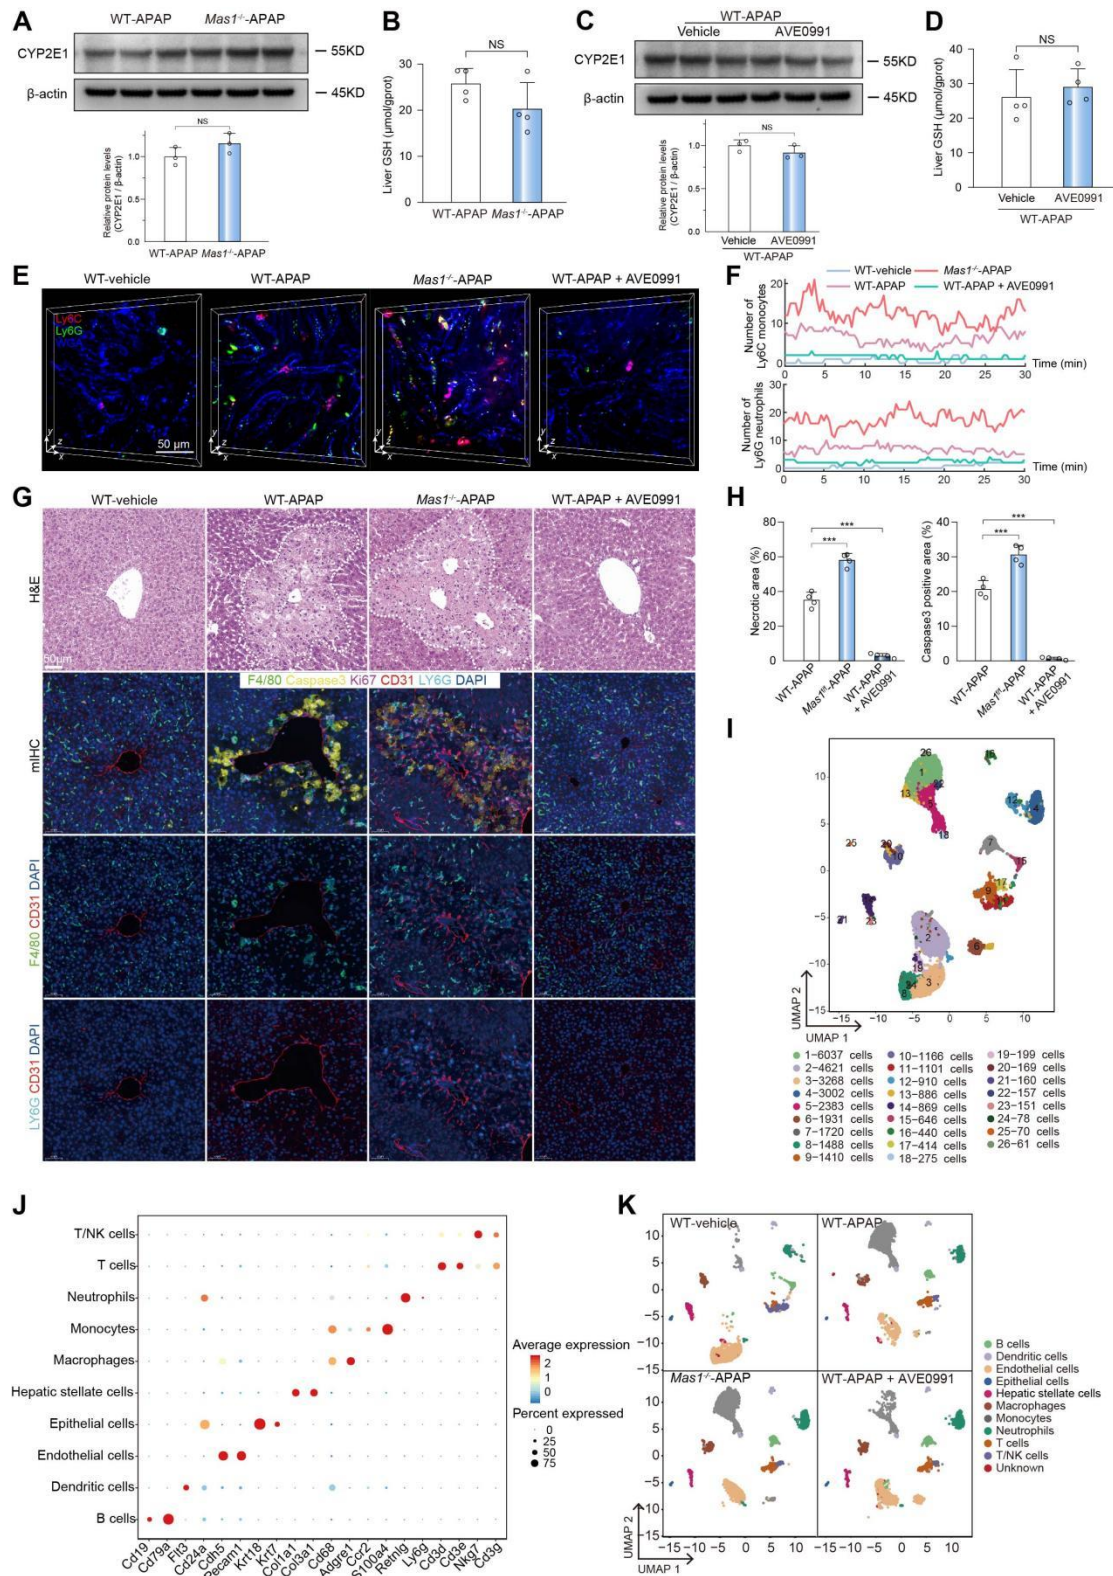

**Figure S1.** Mas modulates cellular infiltration and resident population response during ALI. A) WT and *Mas1<sup>-/-</sup>* mice were challenged with APAP for 24 h. Representative liver immunoblots and quantification of CYP2E1 and  $\beta$ -actin ( $n = 3$  mice per group; two-sided Student's t-test;  $P = 1.68 \times 10^{-1}$ ). B) WT

and *Mas1*<sup>-/-</sup> mice were challenged with APAP for 24 h. Hepatic levels of GSH ( $n = 4$  mice per group; two-sided Student's t-test;  $P = 1.47 \times 10^{-1}$ ). C) Mice were pre-treated with or without AVE0991 for 2 h before APAP challenge for 24 h. Representative liver immunoblots and quantification of CYP2E1 and  $\beta$ -actin ( $n = 3$  mice per group; two-sided Student's t-test;  $P = 2.36 \times 10^{-1}$ ). D) Mice were pre-treated with or without AVE0991 for 2 h before APAP challenge for 24 h. Hepatic levels of GSH ( $n = 4$  mice per group; two-sided Student's t-test;  $P = 5.60 \times 10^{-1}$ ). In E-K, mice were pre-treated with or without AVE0991 for 2 h before APAP or saline challenge for 24 h ( $n = 4$  mice per group). E-F) Timelapse data of neutrophils (Ly6G) and monocytes (Ly6C) in the vessels (WGA) of living mouse livers were captured by DAOSLIMIT. Representative intravital images and the temporal traces of their number are shown. Scale bar: 50  $\mu$ m. G) Representative stainings of H&E and mIHC. Scale bar: 50  $\mu$ m. H) Quantification of necrotic area for H&E as shown in G ( $n = 4$  mice per group; One-way ANOVA with Tukey's test,  $P = 1.70 \times 10^{-5}$  and  $9.90 \times 10^{-7}$  from left to right). Quantification of caspase3 positive area for mIHC as shown in G ( $n = 4$  mice per group; One-way ANOVA with Tukey's test,  $P = 2.47 \times 10^{-4}$  and  $8.34 \times 10^{-7}$  from left to right). I) The UMAP plot of 33,612 single cells from liver samples. J) Dot plot showing the expression levels of marker genes in each cell type. K) The UMAP plot showing the differences of intrahepatic main cell types between different groups. In all graphs data are presented as mean  $\pm$  SD, \*\*\* $P < 0.001$ , NS, not significant. APAP, acetaminophen; H&E, hematoxylin-eosin; mIHC, multiplex immunohistochemistry; UMAP, uniform manifold approximation and projection.

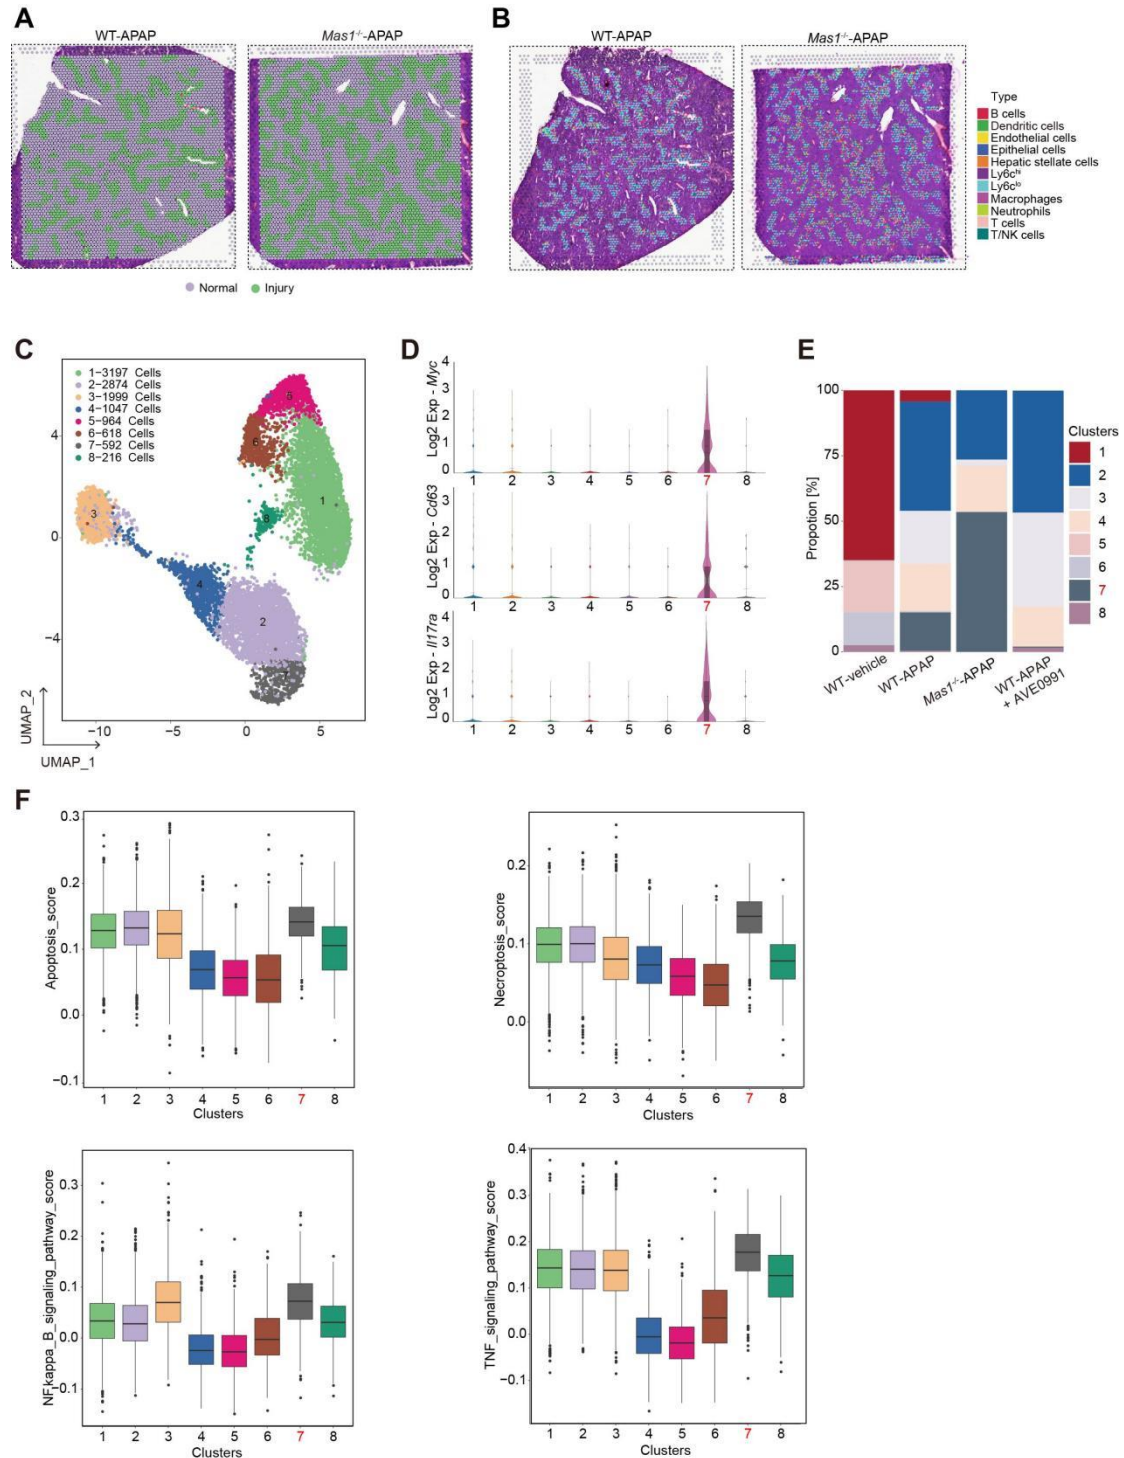

**Figure S2.** The spatial features of intrahepatic main cell types and the characteristics of the pro-inflammatory EC subgroup. A) ST-defined regions including injured regions and normal regions. B) The Robust Cell Type Decomposition (RCTD) algorithm in the spacexr package was used to resolve cell types from a single spot containing a mixture of cell types. C) The UMAP plot of 11,507 single cells from ECs. D) Violin plots showing marker genes of

EC7 cluster. E) Histogram showing the proportion of each cluster between different groups. F) Box plots showing the score of indicated pathway for EC clusters. APAP, acetaminophen; UMAP, uniform manifold approximation and projection; Exp, expression.



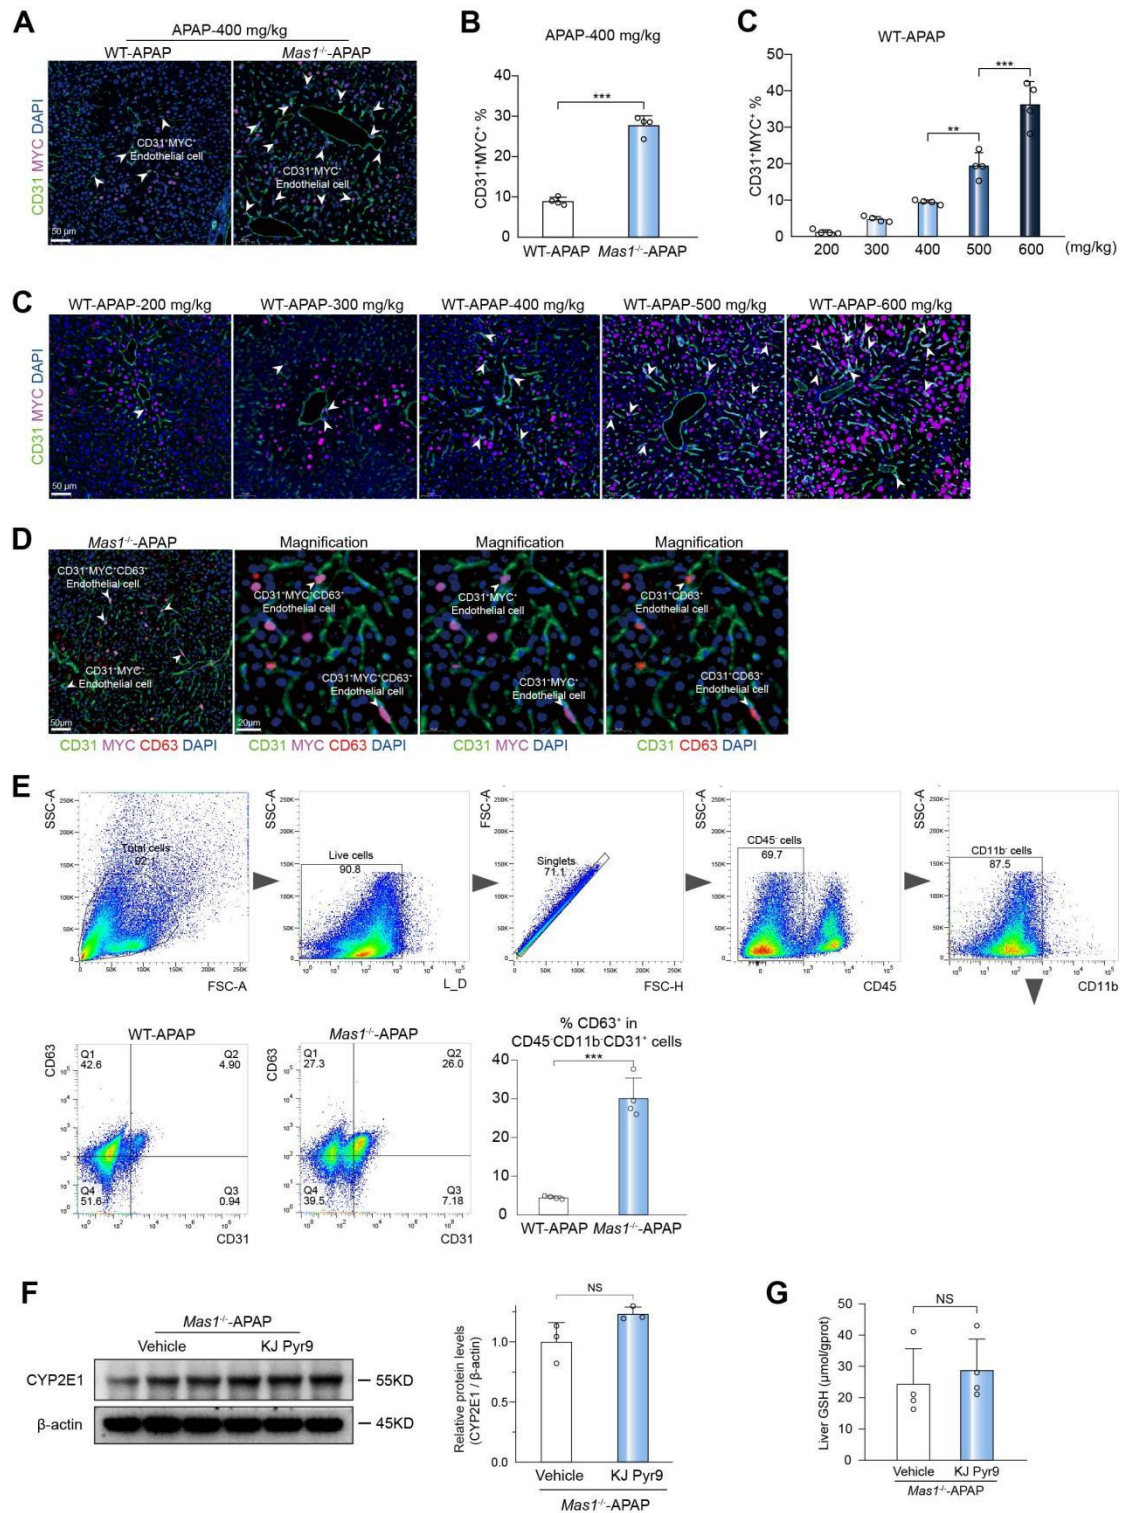

**Figure S3.** Quantitative changes of the pro-inflammatory EC subgroup during ALI. A) WT and *Mas1*<sup>-/-</sup> mice were challenged with APAP (400 mg kg<sup>-1</sup>) for 24 h ( $n = 4$  mice per group). mIHC of CD31<sup>+</sup>MYC<sup>+</sup> ECs are shown. Scale bar: 50 μm. B) Quantification of CD31<sup>+</sup>MYC<sup>+</sup> ECs for mIHC as shown in A ( $n = 4$  mice per group; two-sided Student's t-test,  $P = 6.00 \times 10^{-5}$ ). C) WT mice were



challenged with different dose of APAP (200 mg kg<sup>-1</sup>, 300 mg kg<sup>-1</sup>, 400 mg kg<sup>-1</sup>, 500 mg kg<sup>-1</sup> and 600 mg kg<sup>-1</sup>) for 24 h ( $n = 4$  mice per group). mIHC of CD31<sup>+</sup>MYC<sup>+</sup> ECs are shown. Scale bar: 50  $\mu$ m. Quantification of CD31<sup>+</sup>MYC<sup>+</sup> ECs for mIHC are shown ( $n = 4$  mice per group; One-way ANOVA with Tukey's test,  $P = 5.71 \times 10^{-1}$ ,  $2.94 \times 10^{-1}$ ,  $4.44 \times 10^{-3}$  and  $2.20 \times 10^{-5}$  from left to right). D) *Mas1*<sup>-/-</sup> mice were challenged with APAP for 24 h ( $n = 4$  mice per group). mIHC of CD31<sup>+</sup>MYC<sup>+</sup>CD63<sup>+</sup> ECs are shown. Scale bar: 50  $\mu$ m and 20  $\mu$ m. E) WT and *Mas1*<sup>-/-</sup> mice were challenged with APAP for 24 h ( $n = 4$  mice per group). Representative flow cytometric plots of hepatic CD45<sup>-</sup>CD11b<sup>-</sup>CD31<sup>+</sup> cells showed the difference of CD63<sup>+</sup> fractions between groups. Quantification of CD63<sup>+</sup> fractions are shown ( $n = 4$  mice per group; two-sided Student's t-test,  $P = 6.40 \times 10^{-5}$ ). F) Representative liver immunoblots and quantification of CYP2E1 and  $\beta$ -actin ( $n = 3$  mice per group; two-sided Student's t-test,  $P = 7.65 \times 10^{-2}$ ). G) Hepatic levels of GSH ( $n = 4$  mice per group, two-sided Student's t-test,  $P = 5.79 \times 10^{-1}$ ). In all graphs data are presented as mean  $\pm$  SD, NS, not significant; \*\* $P < 0.01$ ; \*\*\* $P < 0.001$ . APAP, acetaminophen; mIHC, multiplex immunohistochemistry.

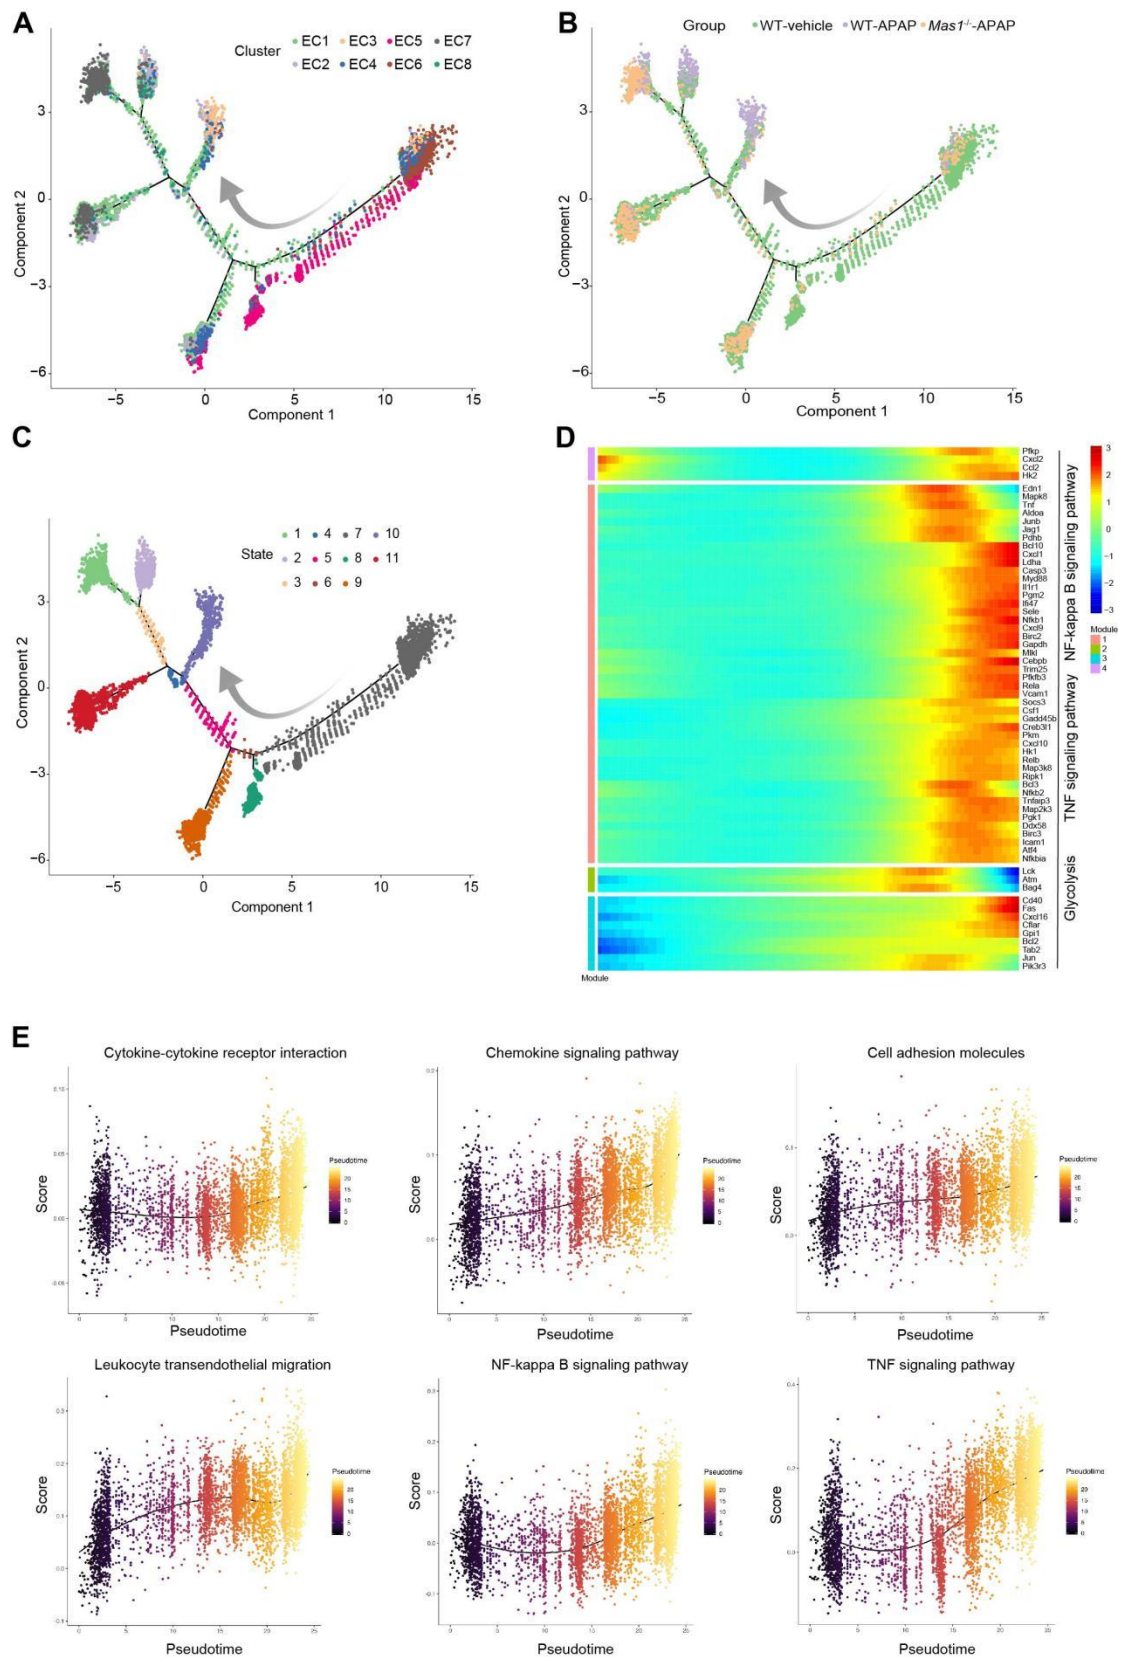

**Figure S4.** Pseudotime trajectory of EC clusters in AILI. A-C) Monocle analyses showing the development of ECs. D) Heatmap showing expression of representative identified genes potentially associated with Glycolysis, TNF

signaling pathway and NF-kappa B signaling pathway. Color key from blue to red indicates relative expression levels from low to high. E) Smoothed expression curves of representative pathways over pseudotime. EC, endothelial cell; APAP, acetaminophen; TNF, tumor necrosis factor; NF-κB, nuclear factor kappa B.

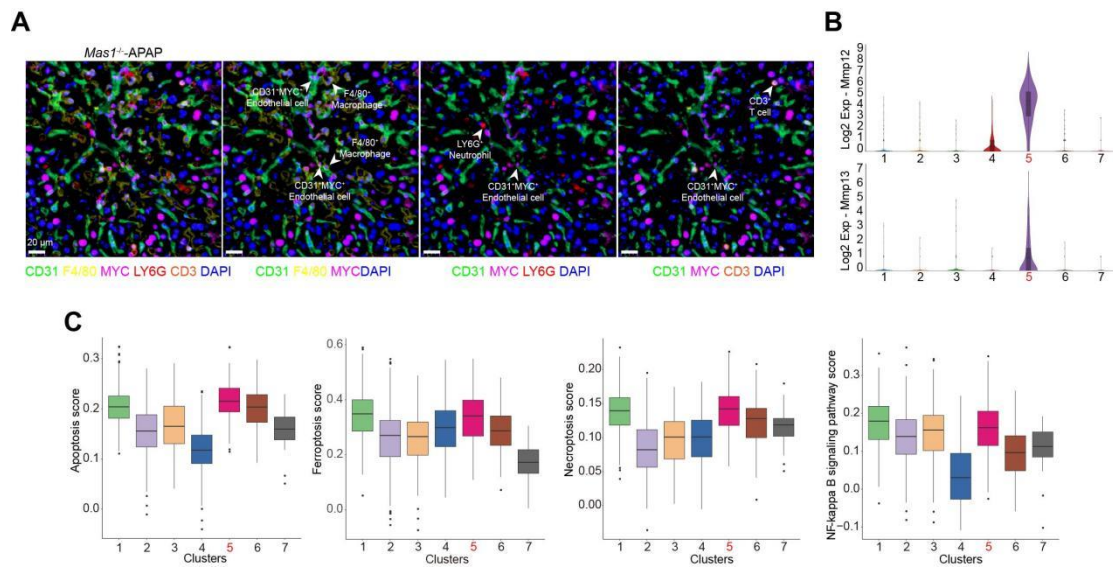

**Figure S5.** The characteristics of the pro-inflammatory M $\phi$  subgroup. A) mIHC of CD31+MYC<sup>+</sup> ECs, M $\phi$  (F4/80<sup>+</sup>), neutrophil (Ly6G<sup>+</sup>) and T cells (CD3<sup>+</sup>). Scale bar: 20  $\mu$ m. B) Violin plots showing the expression of marker genes for M $\phi$ 5. C) Box plots showing the score of indicated pathways for M $\phi$  clusters. APAP, acetaminophen.

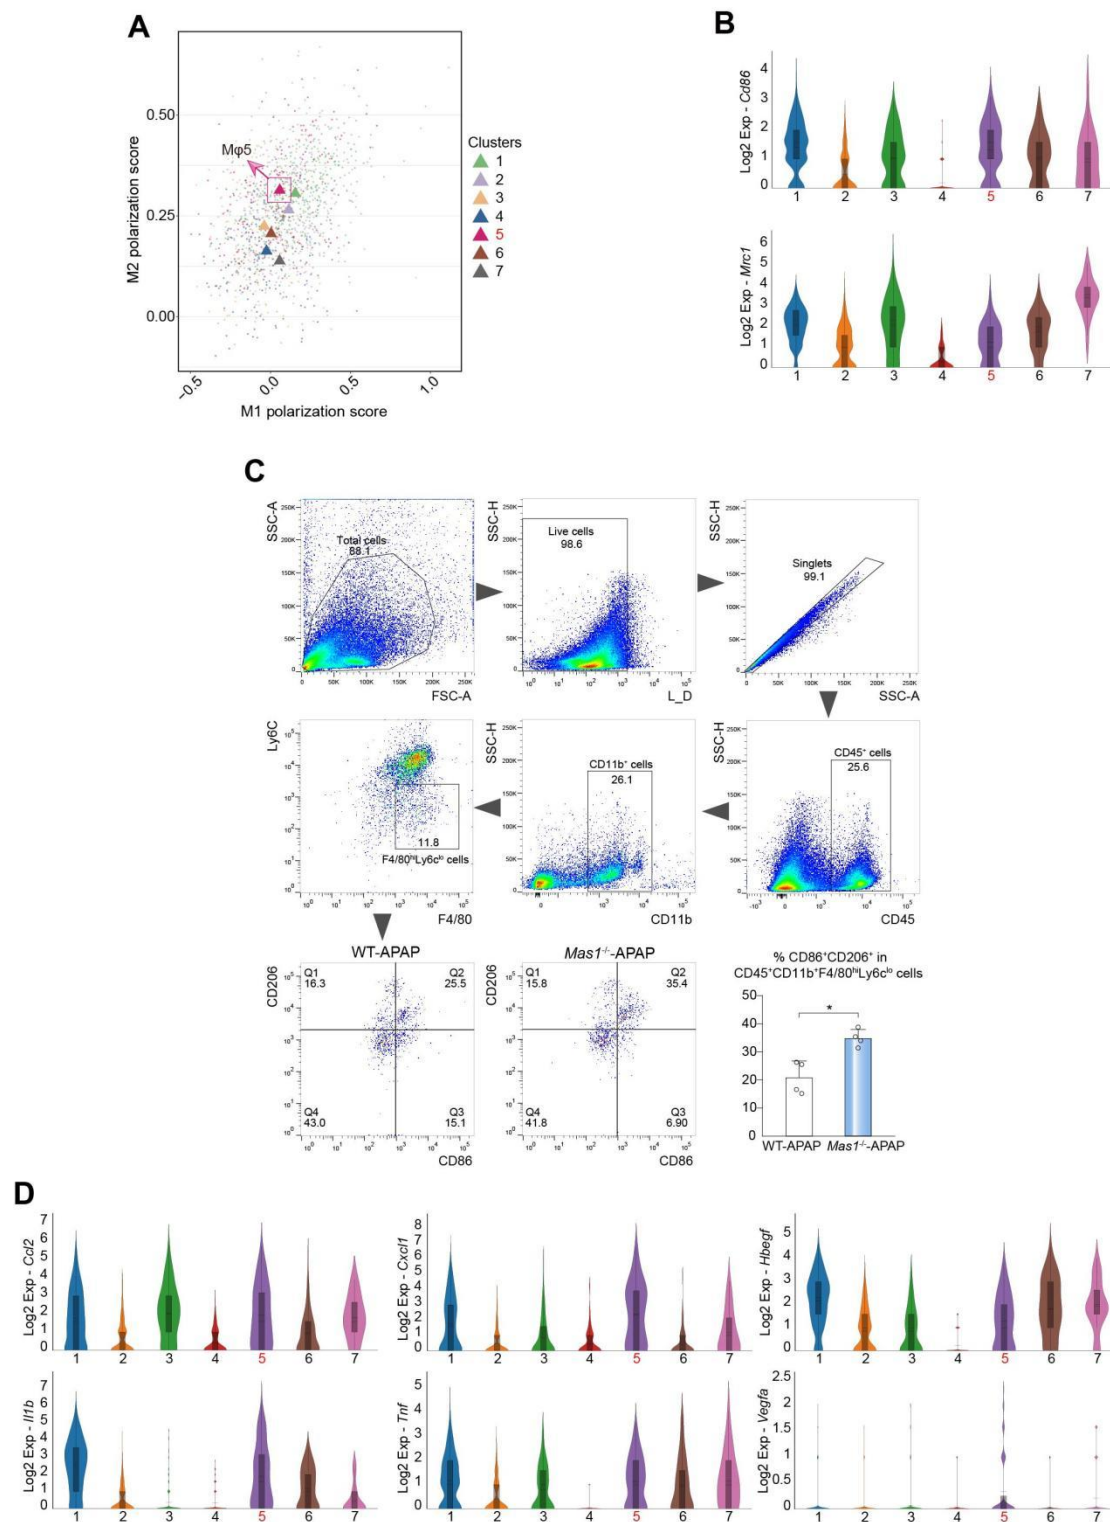

**Figure S6.** Annotation of the pro-inflammatory M $\phi$  subgroup. A) Scatterplots showing the M1 and M2 scores for each color-coded M $\phi$  subgroup. B) Violin plots showing the marker genes of M $\phi$  polarization for M $\phi$  clusters. C) Representative flow cytometric plots of hepatic CD45<sup>+</sup>CD11b<sup>+</sup>F4/80<sup>high</sup>Ly6C<sup>low</sup> cells showing CD86<sup>+</sup>CD206<sup>+</sup> fractions between groups ( $n = 4$  mice per group;

two-sided Student's t-test,  $P = 9.83 \times 10^{-3}$ ). D) Violin plots showing the key genes of proinflammatory factor and angiogenic factor for M $\phi$  clusters. In all graphs data are presented as mean  $\pm$  SD,  $*P < 0.05$ . M $\phi$ , macrophages; Exp, expression; APAP, acetaminophen.

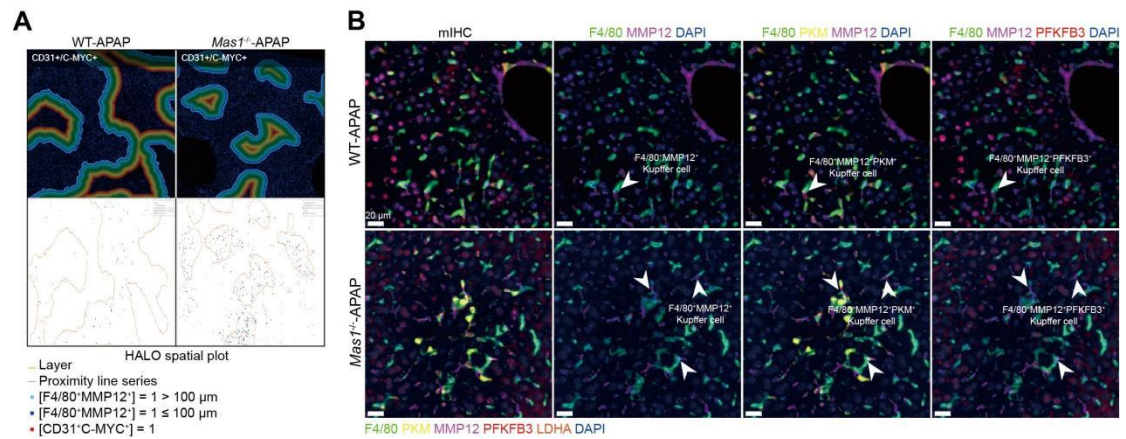

**Figure S7.** EC-secreting lactate induces M $\phi$  glycolysis. A) Spatial localization of CD31<sup>+</sup>MYC<sup>+</sup> ECs and F4/80<sup>+</sup>MMP12<sup>+</sup> M $\phi$  within injured regions. B) mIHC of F4/80<sup>+</sup>MMP12<sup>+</sup> M $\phi$  and key glycolytic enzymes (PFKFB3 and PKM). Scale bar: 20  $\mu$ m. APAP, acetaminophen; mIHC, multiplex immunohistochemistry.



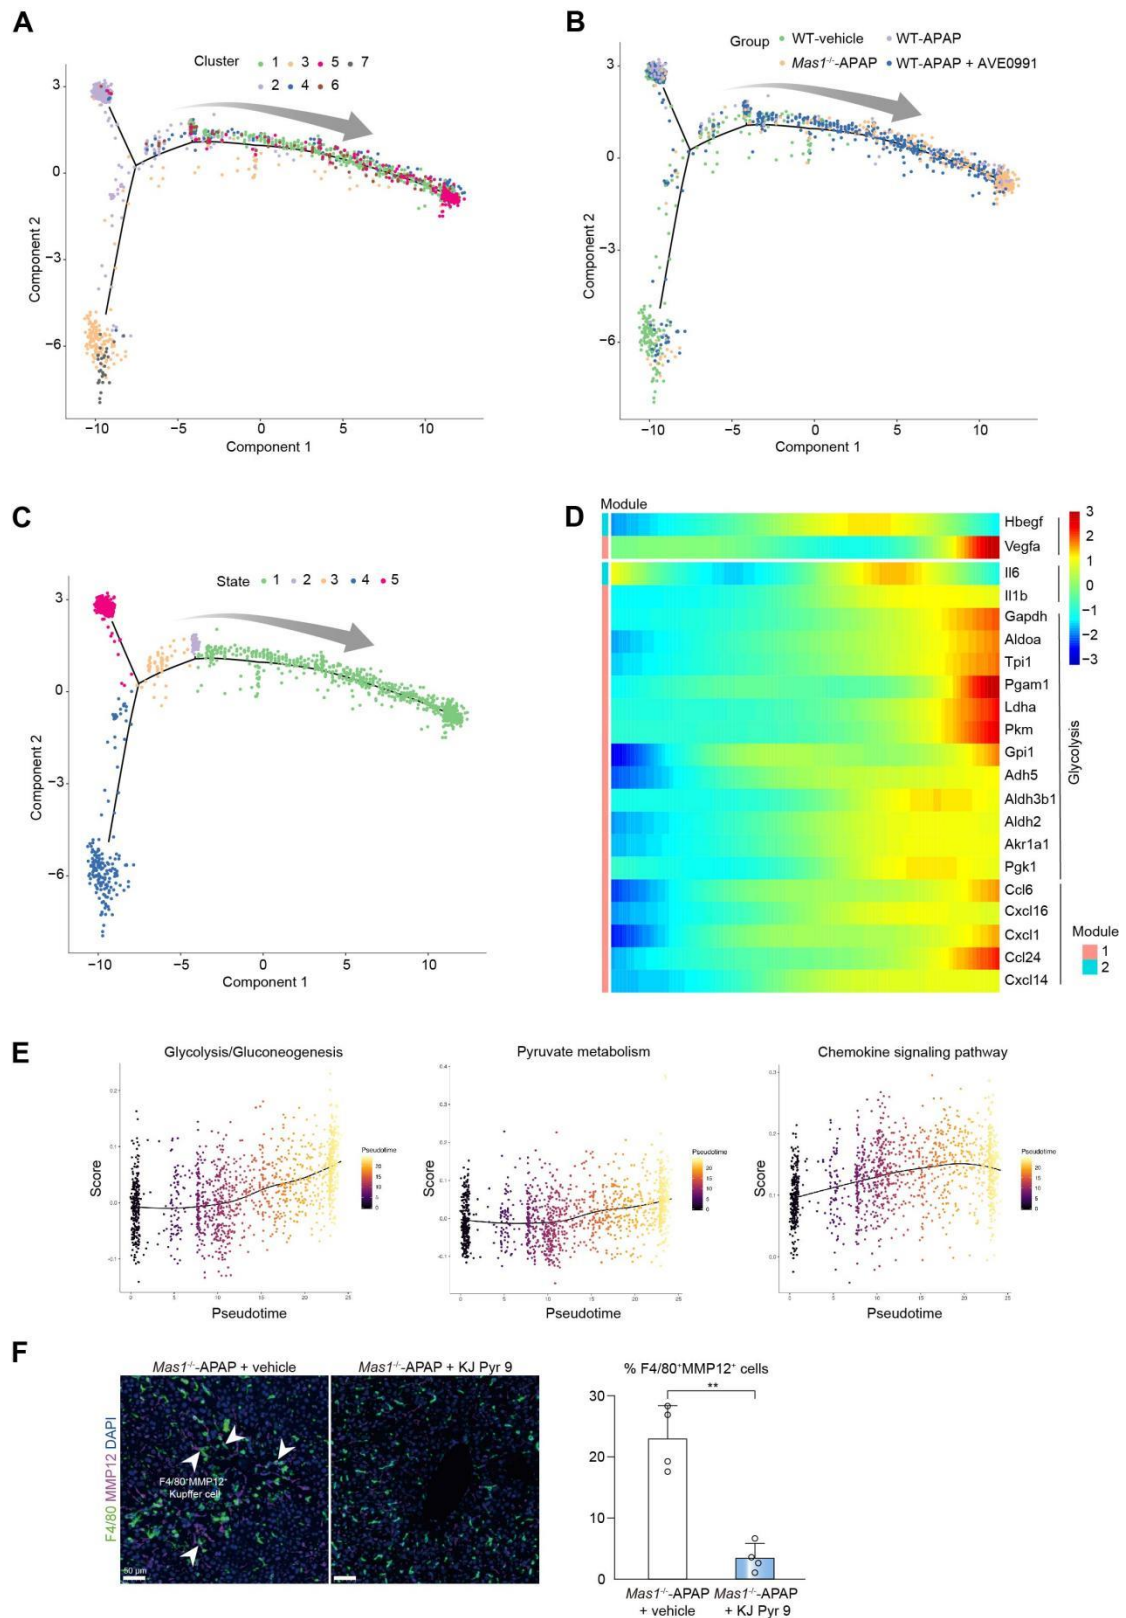

**Figure S8.** Pseudotime trajectory of M $\phi$  clusters in AILI. A-C) Monocle analyses showing the development of M $\phi$ . D) Heatmap showing expression of representative identified genes potentially associated with glycolysis. Color key from blue to red indicates relative expression levels from low to high. E)



Smoothed expression curves of representative pathways over pseudotime. F) *Mas1*<sup>-/-</sup> mice were administrated with or without KJ pyr9 2 h after APAP challenge ( $n = 4$  mice per group). mIHC of F4/80<sup>+</sup>MMP12<sup>+</sup> M $\psi$  and quantification of F4/80<sup>+</sup>MMP12<sup>+</sup> M $\psi$  are shown (two-sided Student's t-test,  $P = 2.41 \times 10^{-3}$ ). Scale bar: 50  $\mu$ m. In all graphs data are presented as mean  $\pm$  SD, \*\* $P < 0.01$ . APAP, acetaminophen; mIHC, multiplex immunohistochemistry.

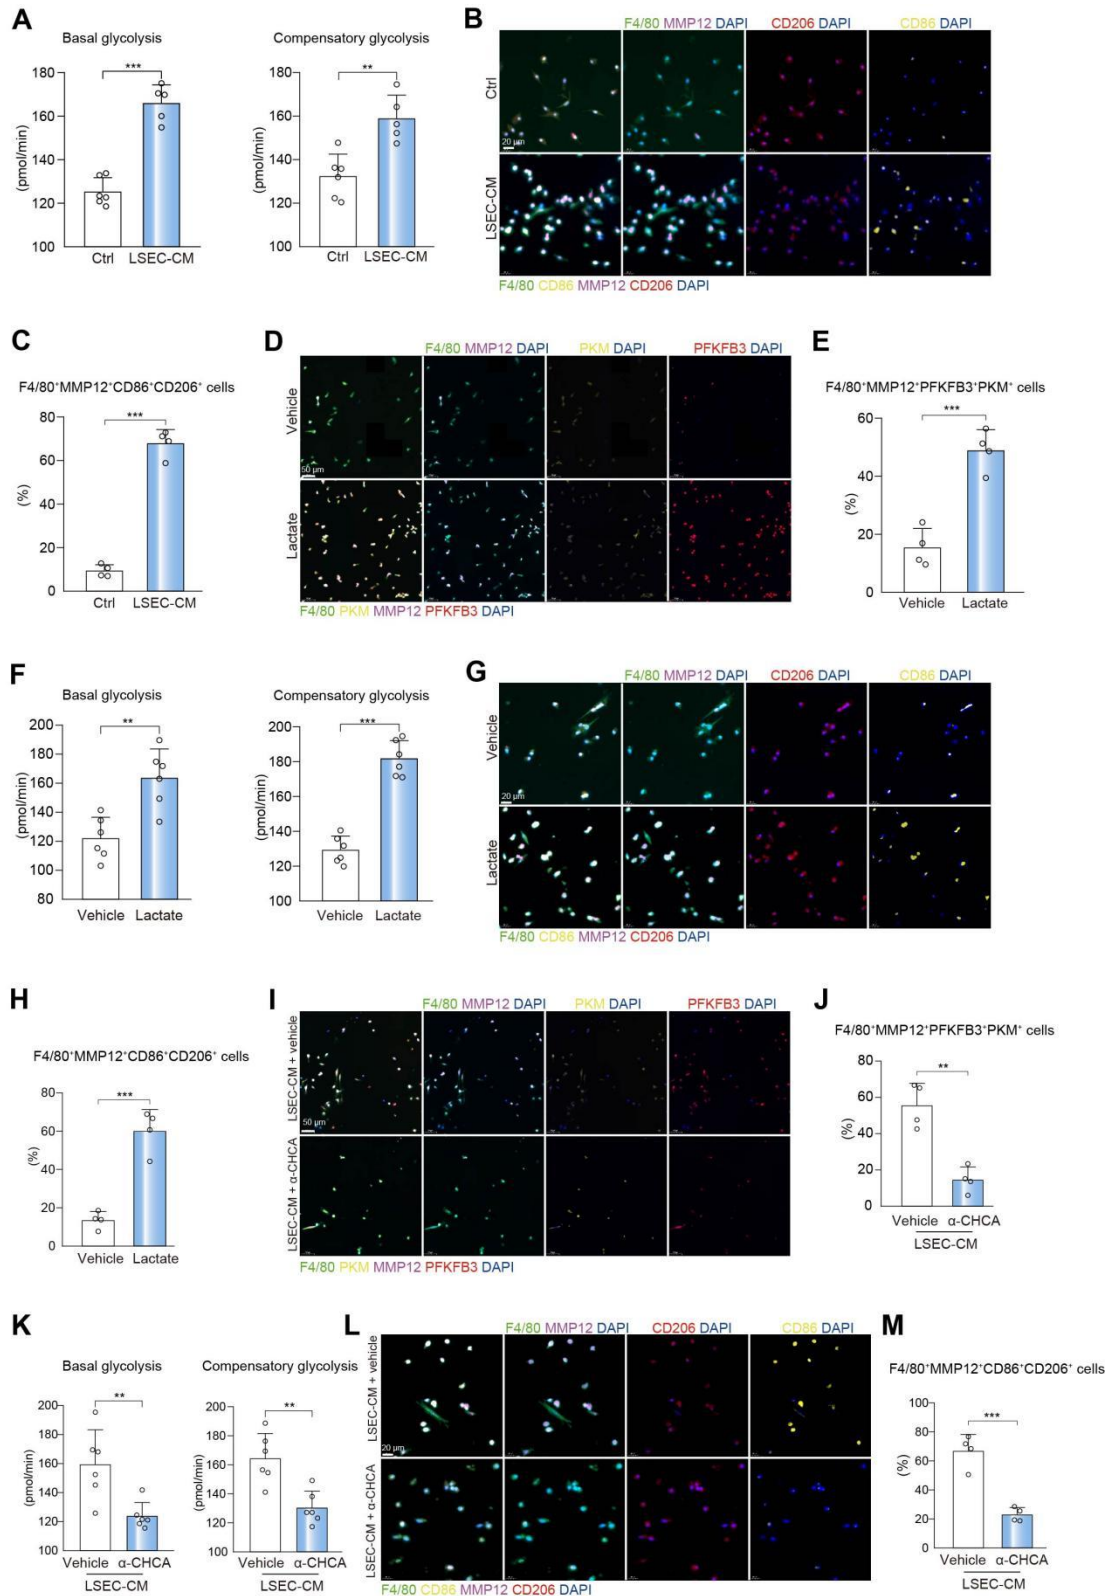

**Figure S9.** EC-secreting lactate induces Mφ glycolysis and polarization. A) Glycolytic rate assay showing glycolytic function of mouse primary kupffer cells treated with or without LSEC-CM for 24 h. ( $n = 5$  or  $6$  samples per group; two-sided Student's t-test,  $P = 7.00 \times 10^{-6}$  and  $2.21 \times 10^{-3}$  from left to right). B)

Multiplex fluorescence of F4/80<sup>+</sup>MMP12<sup>+</sup> kupffer cells and the markers of M $\mu$  polarization (CD206 and CD86). Scale bar: 20  $\mu$ m. The mouse primary kupffer cells were treated with or without LSEC-CM for 24 h. C) Quantification of F4/80<sup>+</sup>MMP12<sup>+</sup>CD86<sup>+</sup>CD206<sup>+</sup> kupffer cells for multiplex fluorescence as shown in B ( $n = 4$  samples per group; two-sided Student's t-test,  $P = 3.00 \times 10^{-6}$ ). D) Multiplex fluorescence of F4/80<sup>+</sup>MMP12<sup>+</sup> kupffer cells and key glycolytic enzymes (PKM and PFKFB3). Scale bar: 50  $\mu$ m. The mouse primary kupffer cells were treated with or without Lactate (10 mM) for 24 h. E) Quantification of F4/80<sup>+</sup>MMP12<sup>+</sup>PFKFB3<sup>+</sup>PKM<sup>+</sup> kupffer cells for multiplex fluorescence as shown in D ( $n = 4$  samples per group; two-sided Student's t-test,  $P = 4.55 \times 10^{-4}$ ). F) Glycolytic rate assay showing glycolytic function of mouse primary kupffer cells treated with or without lactate (10 mM) for 24 h. ( $n = 6$  samples per group; two-sided Student's t-test,  $P = 2.03 \times 10^{-3}$  and  $2.00 \times 10^{-6}$  from left to right). G) Multiplex fluorescence of F4/80<sup>+</sup>MMP12<sup>+</sup> kupffer cells and the markers of M $\mu$  polarization (CD206 and CD86). Scale bar: 20  $\mu$ m. The mouse primary kupffer cells were treated with or without lactate (10 mM) for 24 h. H) Quantification of F4/80<sup>+</sup>MMP12<sup>+</sup>CD86<sup>+</sup>CD206<sup>+</sup> kupffer cells for multiplex fluorescence as shown in G ( $n = 4$  samples per group; two-sided Student's t-test,  $P = 2.42 \times 10^{-4}$ ). I) Multiplex fluorescence of F4/80<sup>+</sup>MMP12<sup>+</sup> kupffer cells and key glycolytic enzymes (PKM and PFKFB3). Scale bar: 50  $\mu$ m. The mouse primary kupffer cells were treated with LSEC-CM for 24 h, with or without  $\alpha$ -CHCA (5 mM) treatment. J) Quantification of F4/80<sup>+</sup>MMP12<sup>+</sup>PFKFB3<sup>+</sup>PKM<sup>+</sup> kupffer cells for multiplex fluorescence as shown in I ( $n = 4$  samples per group; two-sided Student's t-test,  $P = 1.16 \times 10^{-3}$ ). K) Glycolytic rate assay showing glycolytic function of mouse primary kupffer cells treated with LSEC-CM for 24 h, with or without  $\alpha$ -CHCA (5 mM) treatment. ( $n = 6$  samples per group; two-sided Student's t-test,  $P = 6.79 \times 10^{-3}$  and  $2.29 \times 10^{-3}$  from left to right). L) Multiplex fluorescence of F4/80<sup>+</sup>MMP12<sup>+</sup> kupffer cells and the markers of M $\mu$  polarization (CD206 and CD86). Scale bar: 20  $\mu$ m. The mouse primary kupffer cells were treated with LSEC-CM for 24 h, with or without  $\alpha$ -CHCA (5 mM)

treatment. M) Quantification of F4/80<sup>+</sup>MMP12<sup>+</sup>CD86<sup>+</sup>CD206<sup>+</sup> kupffer cells for multiplex fluorescence as shown in L ( $n = 4$  samples per group; two-sided Student's t-test,  $P = 3.91 \times 10^{-4}$ ). In all graphs data are presented as mean  $\pm$  SD,  $**P < 0.01$ ;  $***P < 0.001$ . LSEC, liver sinusoidal endothelial cell; CM, conditioned medium;  $\alpha$ -CHCA,  $\alpha$ -cyano-4-hydroxycinnamic acid.

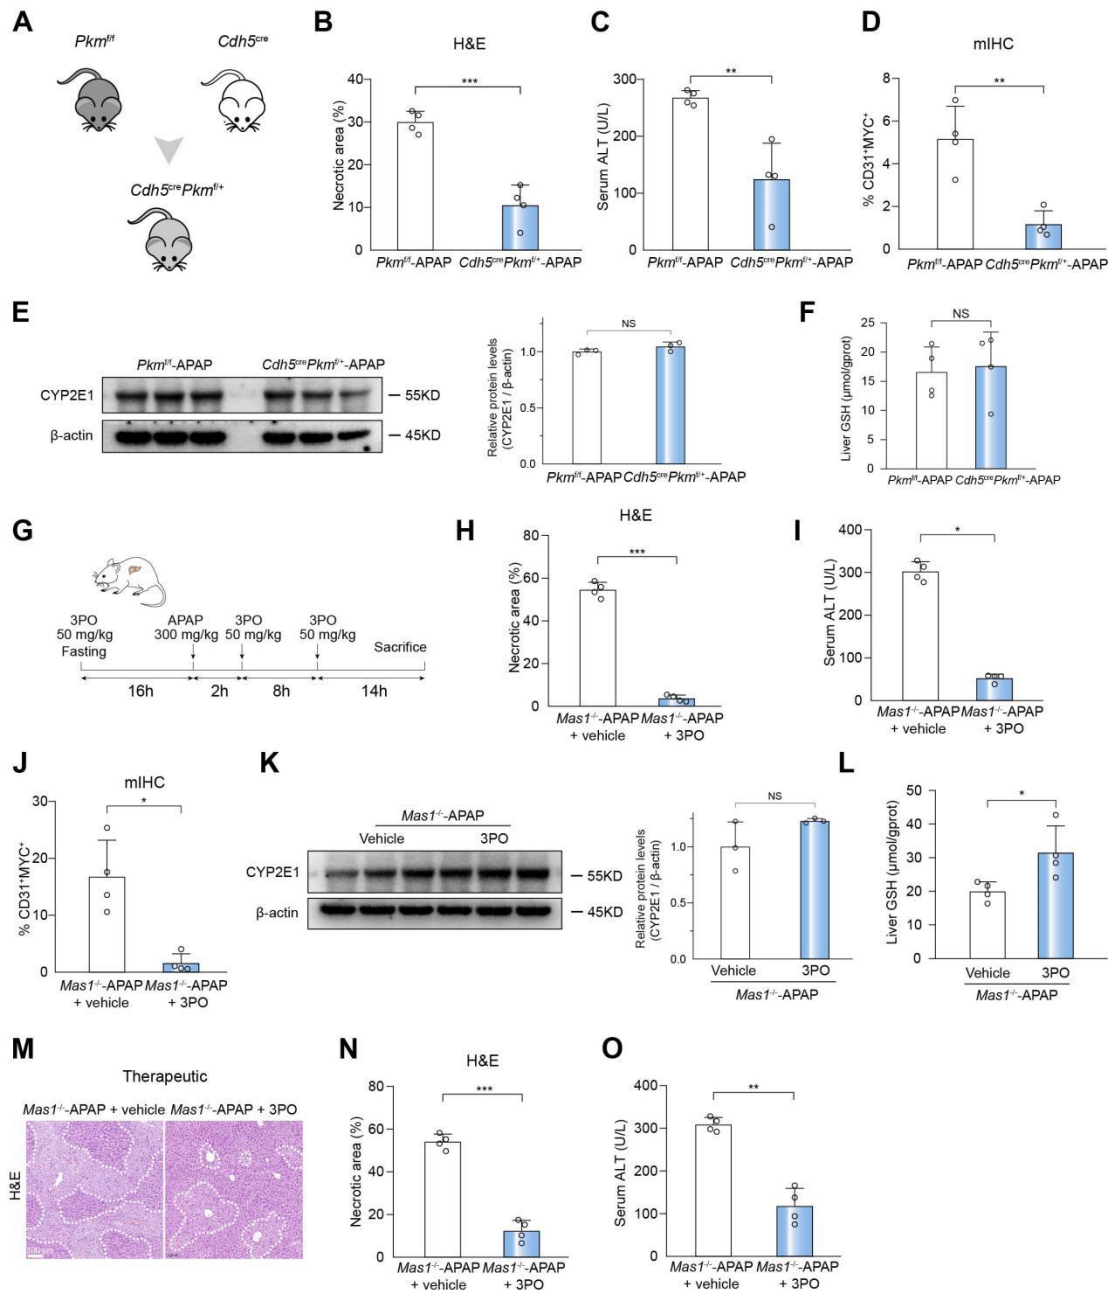

**Figure S10.** Inhibition of glycolysis alleviates ALI. A) The endothelial cell-specific *Pkm* knockout (*Cdh5<sup>cre</sup>Pkm<sup>fl/+</sup>*) mice were generated by crossing *Pkm<sup>fl/fl</sup>* with *Cdh5<sup>cre</sup>* mice. B) Quantification of necrotic area for H&E as shown in Figure 2L ( $n = 4$  mice per group; two-sided Student's t-test,  $P = 3.56 \times 10^{-4}$ ). C) Serum ALT, a measure of hepatic injury ( $n = 4$  mice per group; two-sided Student's t-test,  $P = 4.46 \times 10^{-3}$ ). D) Quantification of CD31<sup>+</sup>MYC<sup>+</sup> ECs for mIHC as shown in Figure 2L ( $n = 4$  mice per group; two-sided Student's t-test,  $P = 2.92 \times 10^{-3}$ ). E) Representative liver immunoblots and quantification of CYP2E1 and β-actin ( $n = 3$  mice per group; two-sided Student's t-test,  $P = 1.64 \times 10^{-1}$ ). F)

Hepatic levels of GSH ( $n = 4$  mice per group, two-sided Student's t-test,  $P = 7.92 \times 10^{-1}$ ). G) *Mas1*<sup>-/-</sup> mice were administrated with or without 3PO under APAP challenge as indicated ( $n = 4$  mice per group). H) Quantification of necrotic area for H&E as shown in Figure 2M ( $n = 4$  mice per group; two-sided Student's t-test,  $P = 2.00 \times 10^{-7}$ ). I) Serum ALT, a measure of hepatic injury ( $n = 4$  mice per group; two-sided Mann-Whitney U test,  $P = 2.86 \times 10^{-2}$ ). J) Quantification of CD31<sup>+</sup>MYC<sup>+</sup> ECs for mIHC as shown in Figure 2M ( $n = 4$  mice per group; two-sided Mann-Whitney U test,  $P = 2.86 \times 10^{-2}$ ). K) Representative liver immunoblots and quantification of CYP2E1 and  $\beta$ -actin ( $n = 3$  mice per group; two-sided Student's t-test,  $P = 1.46 \times 10^{-1}$ ). L) Hepatic levels of GSH ( $n = 4$  mice per group, two-sided Student's t-test,  $P = 3.46 \times 10^{-2}$ ). M) Representative H&E staining. Scale bar: 100  $\mu$ m. *Mas1*<sup>-/-</sup> mice were therapeutically administrated with or without 3PO 2 h after APAP challenge ( $n = 4$  mice per group). N) Quantification of necrotic area for H&E as shown in M ( $n = 4$  mice per group; two-sided Student's t-test,  $P = 9.00 \times 10^{-6}$ ). O) Serum ALT, a measure of hepatic injury ( $n = 4$  mice per group; two-sided Student's t-test,  $P = 1.09 \times 10^{-3}$ ). In all graphs data are presented as mean  $\pm$  SD, \* $P < 0.05$ ; \*\* $P < 0.01$ ; \*\*\* $P < 0.001$ , NS, not significant. APAP, acetaminophen; ALT, alaninetransaminase; mIHC, multiplex immunohistochemistry; H&E, hematoxylin-eosin.



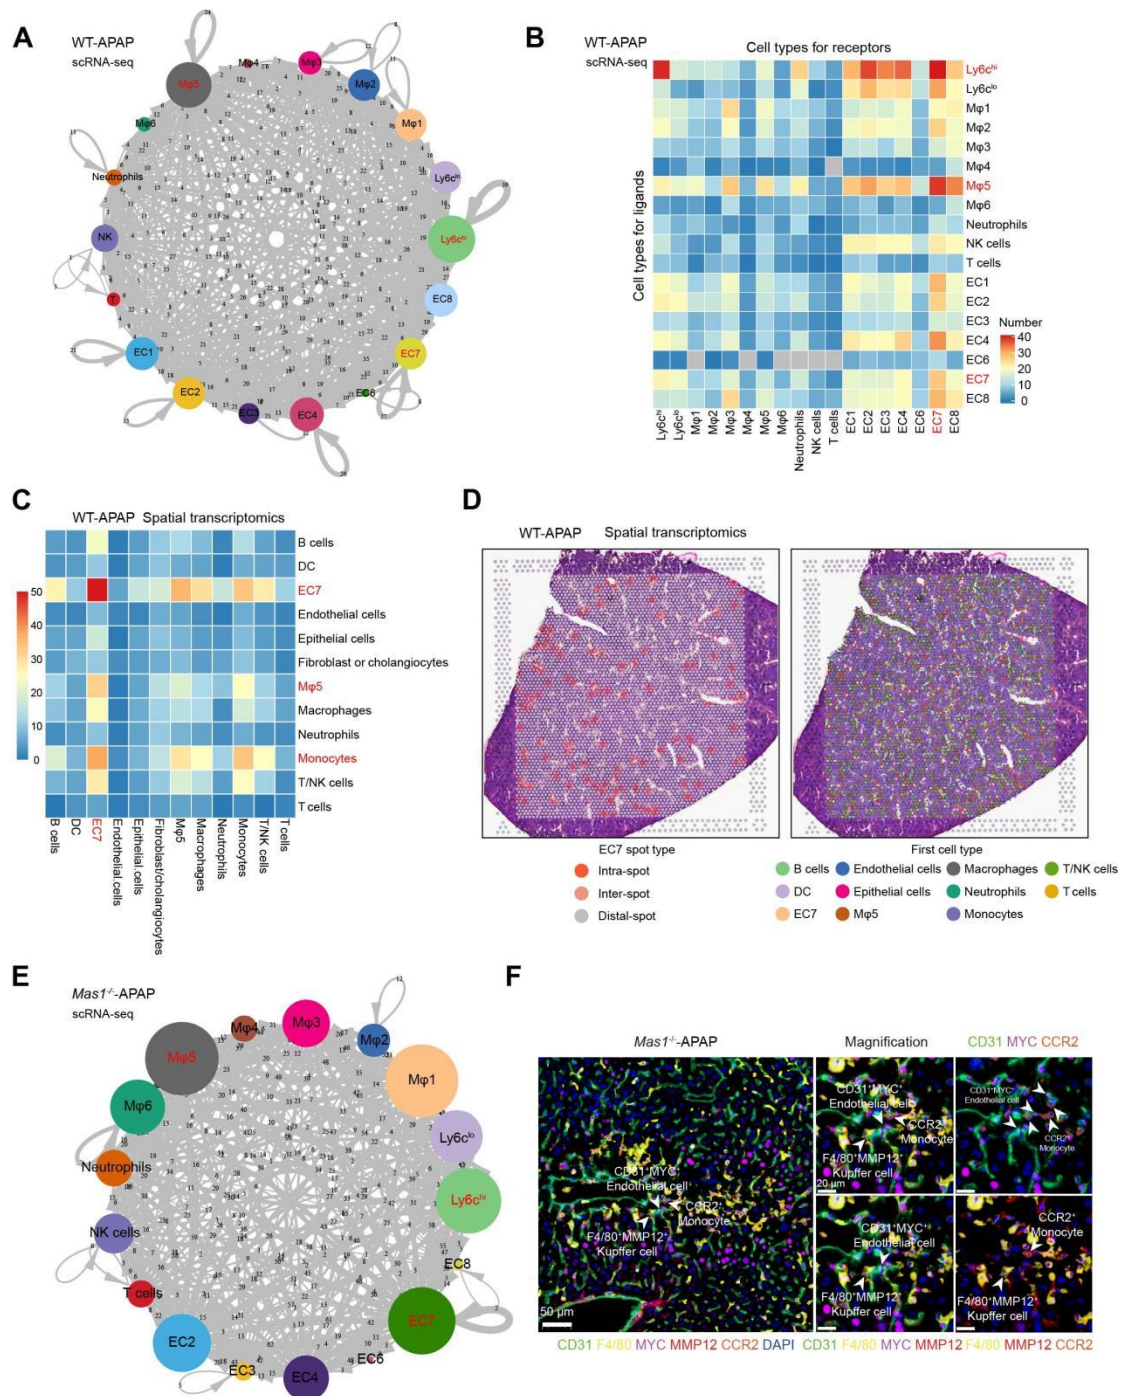

**Figure S11.** The crosstalk between monocyte and CD31<sup>+</sup>MYC<sup>+</sup>CD63<sup>+</sup> EC subgroup. A) CellPhoneDB analysis showing the cell–cell interactions for scRNA-seq. B) CellPhoneDB analysis showing the cell–cell interactions for scRNA-seq. C) CellPhoneDB analysis showing the cell–cell interactions for ST. D) Schematic diagram indicating the intra-spots, inter-spots and distal-spots for ST. Intra-spots, EC7-localized spots; Inter-spots, EC7-surrounded spots; Distal-spots, other distant spots. Spatial feature plots showing the first cell type

in EC7 expansion units. E) CellPhoneDB analysis showing the cell–cell interactions for scRNA-seq. F) mIHC of CD31<sup>+</sup>MYC<sup>+</sup> ECs, F4/80<sup>+</sup>MMP12<sup>+</sup> M $\psi$  and CCR2<sup>+</sup> monocytes are shown. Scale bar: 50  $\mu$ m and 20  $\mu$ m. APAP, acetaminophen; scRNA-seq, single-cell RNA sequencing; M $\psi$ , macrophages; EC, endothelial cell.

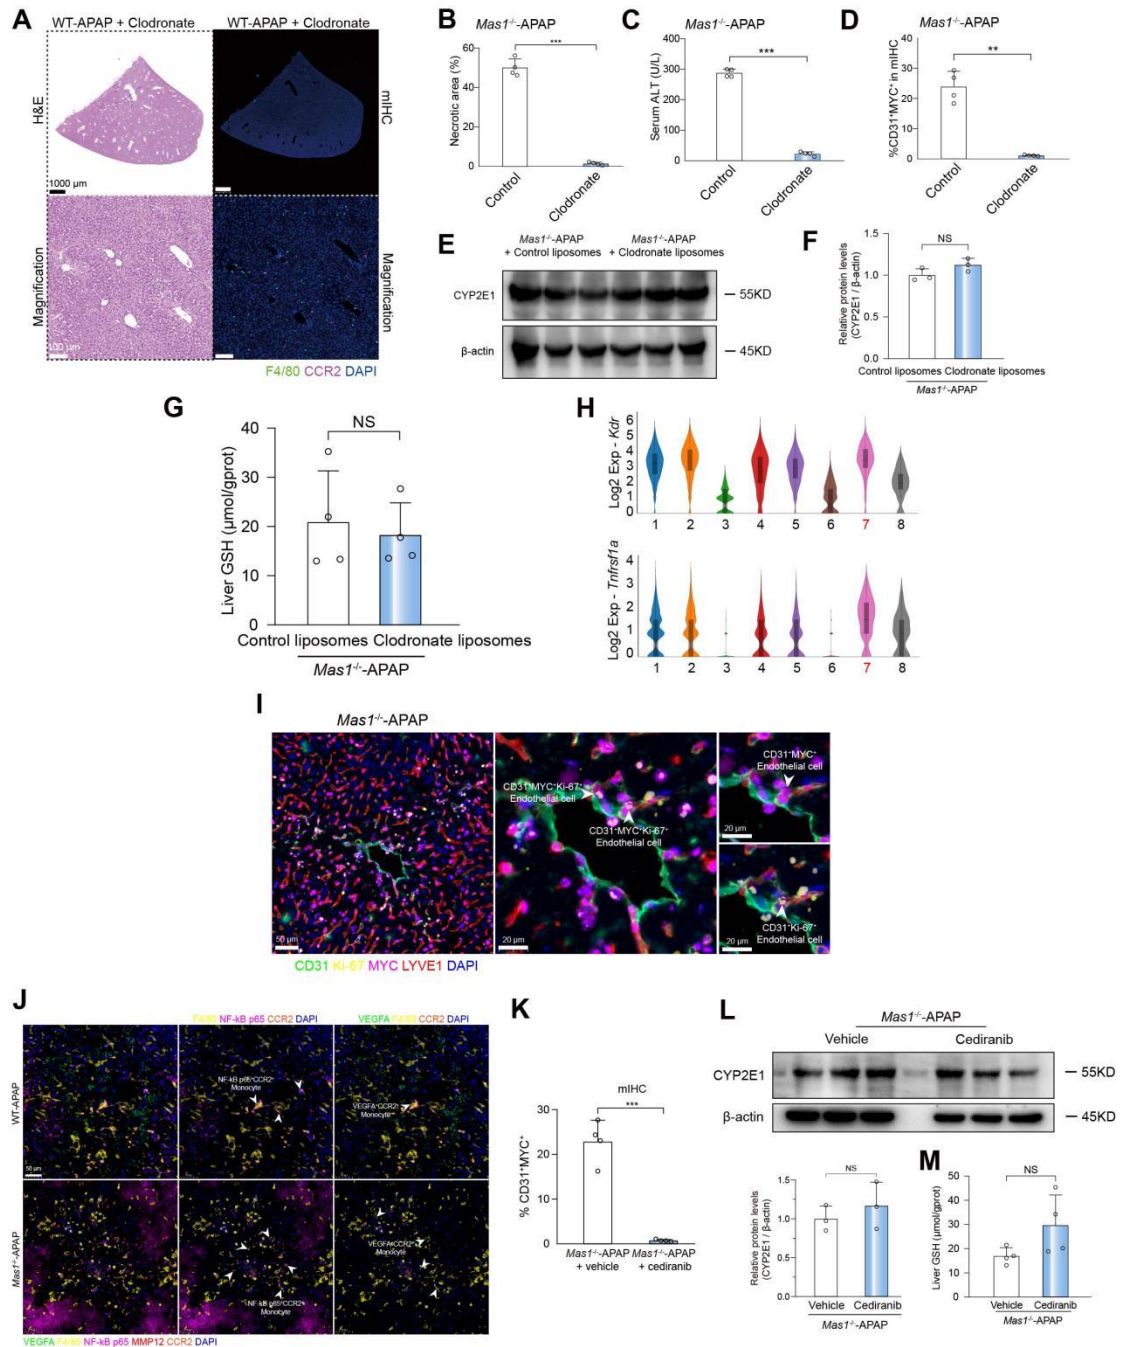

**Figure S12.** *Mas1* deficiency induces a pro-inflammatory response in monocytes, and pro-inflammatory monocytes induce CD31<sup>+</sup>MYC<sup>+</sup>CD63<sup>+</sup> EC subgroup proliferation. A) WT mice were pre-administrated with clodronate liposomes for 24 h before APAP challenge ( $n = 4$  mice per group). Representative stainings of H&E and mIHC are shown. Scale bar: 1000  $\mu$ m and 100  $\mu$ m. B) Quantification of necrotic area for H&E as shown in Figure 3C ( $n = 4$  mice per group; two-sided Student's t-test,  $P = 6.43 \times 10^{-7}$ ). C) Serum ALT, a measure of hepatic injury ( $n = 4$  mice per group; two-sided Student's t-test,  $P$

=  $1.00 \times 10^{-6}$ ). D) Quantification of CD31<sup>+</sup>MYC<sup>+</sup> ECs for mIHC as shown in Figure 3C ( $n = 4$  mice per group; two-sided Student's t-test,  $P = 2.88 \times 10^{-3}$ ). E) Representative liver immunoblots of CYP2E1 and  $\beta$ -actin. F) Quantification of CYP2E1 and  $\beta$ -actin (two-sided Student's t-test,  $P = 1.23 \times 10^{-1}$ ). G) Hepatic levels of GSH ( $n = 4$  mice per group, two-sided Student's t-test,  $P = 6.88 \times 10^{-1}$ ). H) Violin plots showing the indicated genes of EC clusters. I) mIHC of the proliferative CD31<sup>+</sup>MYC<sup>+</sup>Ki-67<sup>+</sup> ECs. Scale bar: 50  $\mu$ m and 20  $\mu$ m. J) WT mice and *Mas1*<sup>-/-</sup> mice were administrated with APAP for 24 h ( $n = 4$  mice per group). mIHC of NF- $\kappa$ B p65<sup>+</sup>VEGFA<sup>+</sup>CCR2<sup>+</sup> monocytes. Scale bar: 50  $\mu$ m. K) Quantification of CD31<sup>+</sup>MYC<sup>+</sup> ECs for mIHC as shown in Figure 3F ( $n = 4$  mice per group; two-sided Student's t-test,  $P = 9.30 \times 10^{-5}$ ). L) Representative liver immunoblots and quantification of CYP2E1 and  $\beta$ -actin ( $n = 3$  mice per group; two-sided Student's t-test,  $P = 4.48 \times 10^{-1}$ ). M) Hepatic levels of GSH ( $n = 4$  mice per group, two-sided Student's t-test,  $P = 1.34 \times 10^{-1}$ ). In all graphs data are presented as mean  $\pm$  SD, \*\* $P < 0.01$ ; \*\*\* $P < 0.001$ ; NS, not significant. APAP, acetaminophen; H&E, hematoxylin-eosin; mIHC, multiplex immunohistochemistry; ALT, alaninetransaminase; Exp, expression.



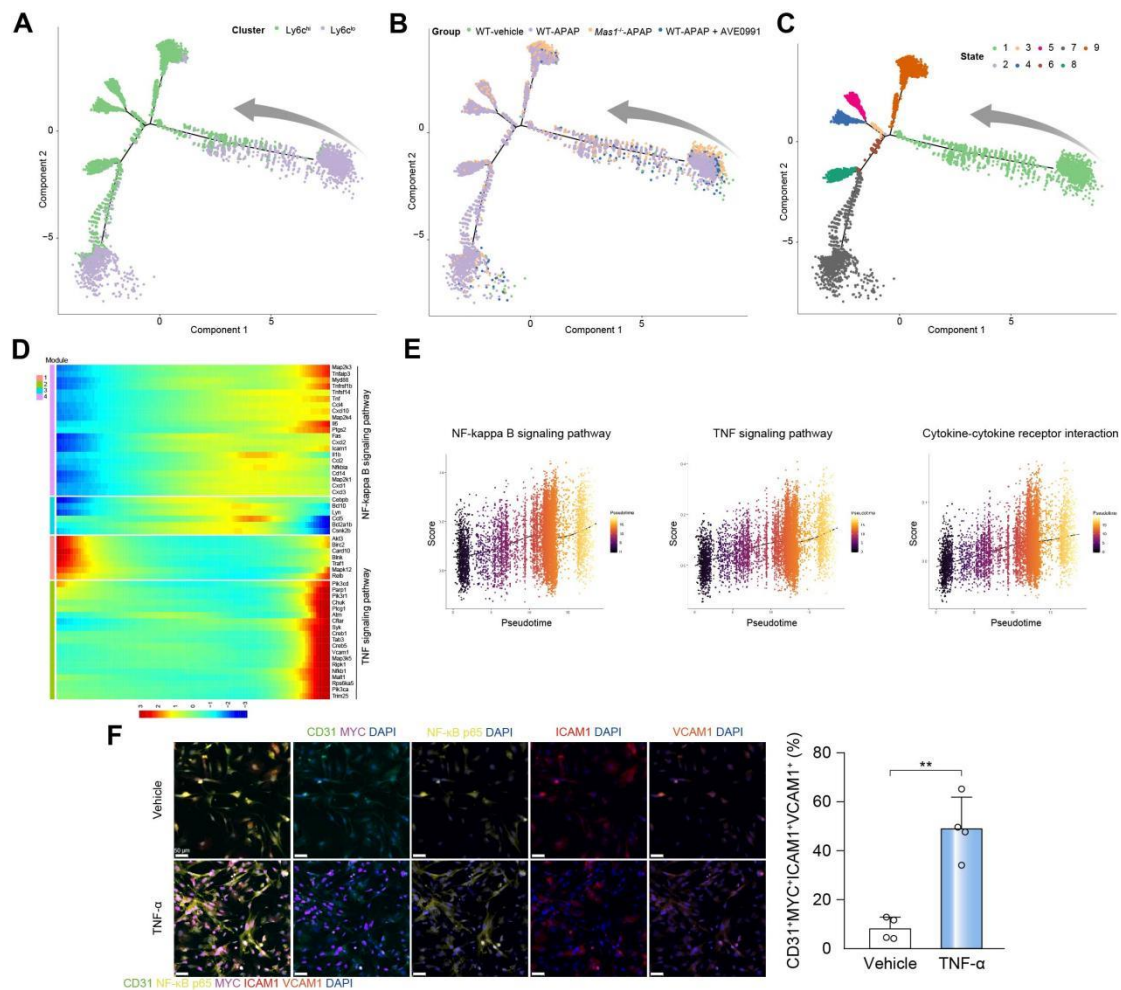

**Figure S13.** Pseudotime trajectory of monocytes clusters in ALLI. A-C) Monocle analyses showing the development of monocytes. D) Heatmap showing expression of representative identified genes potentially associated with TNF signaling pathway and NF-kappa B signaling pathway. Color key from blue to red indicates relative expression levels from low to high. E) Smoothed expression curves of representative pathways over pseudotime. F) Multiplex fluorescence of CD31<sup>+</sup>MYC<sup>+</sup>ICAM1<sup>+</sup>VCAM1<sup>+</sup> LSECs. Scale bar: 50  $\mu$ m. The mouse primary LSECs were treated with or without TNF- $\alpha$  (20 ng ml<sup>-1</sup>) for 24 h. Quantification of CD31<sup>+</sup>MYC<sup>+</sup>ICAM1<sup>+</sup>VCAM1<sup>+</sup> LSECs for multiplex fluorescence are shown ( $n = 4$  samples per group; two-sided Student's t-test,  $P = 9.39 \times 10^{-4}$ ). In all graphs data are presented as mean  $\pm$  SD, \*\* $P < 0.01$ . TNF- $\alpha$ , tumor necrosis factor- $\alpha$ ; APAP, acetaminophen; NF-kappa B, NF- $\kappa$ B, nuclear factor kappa B.

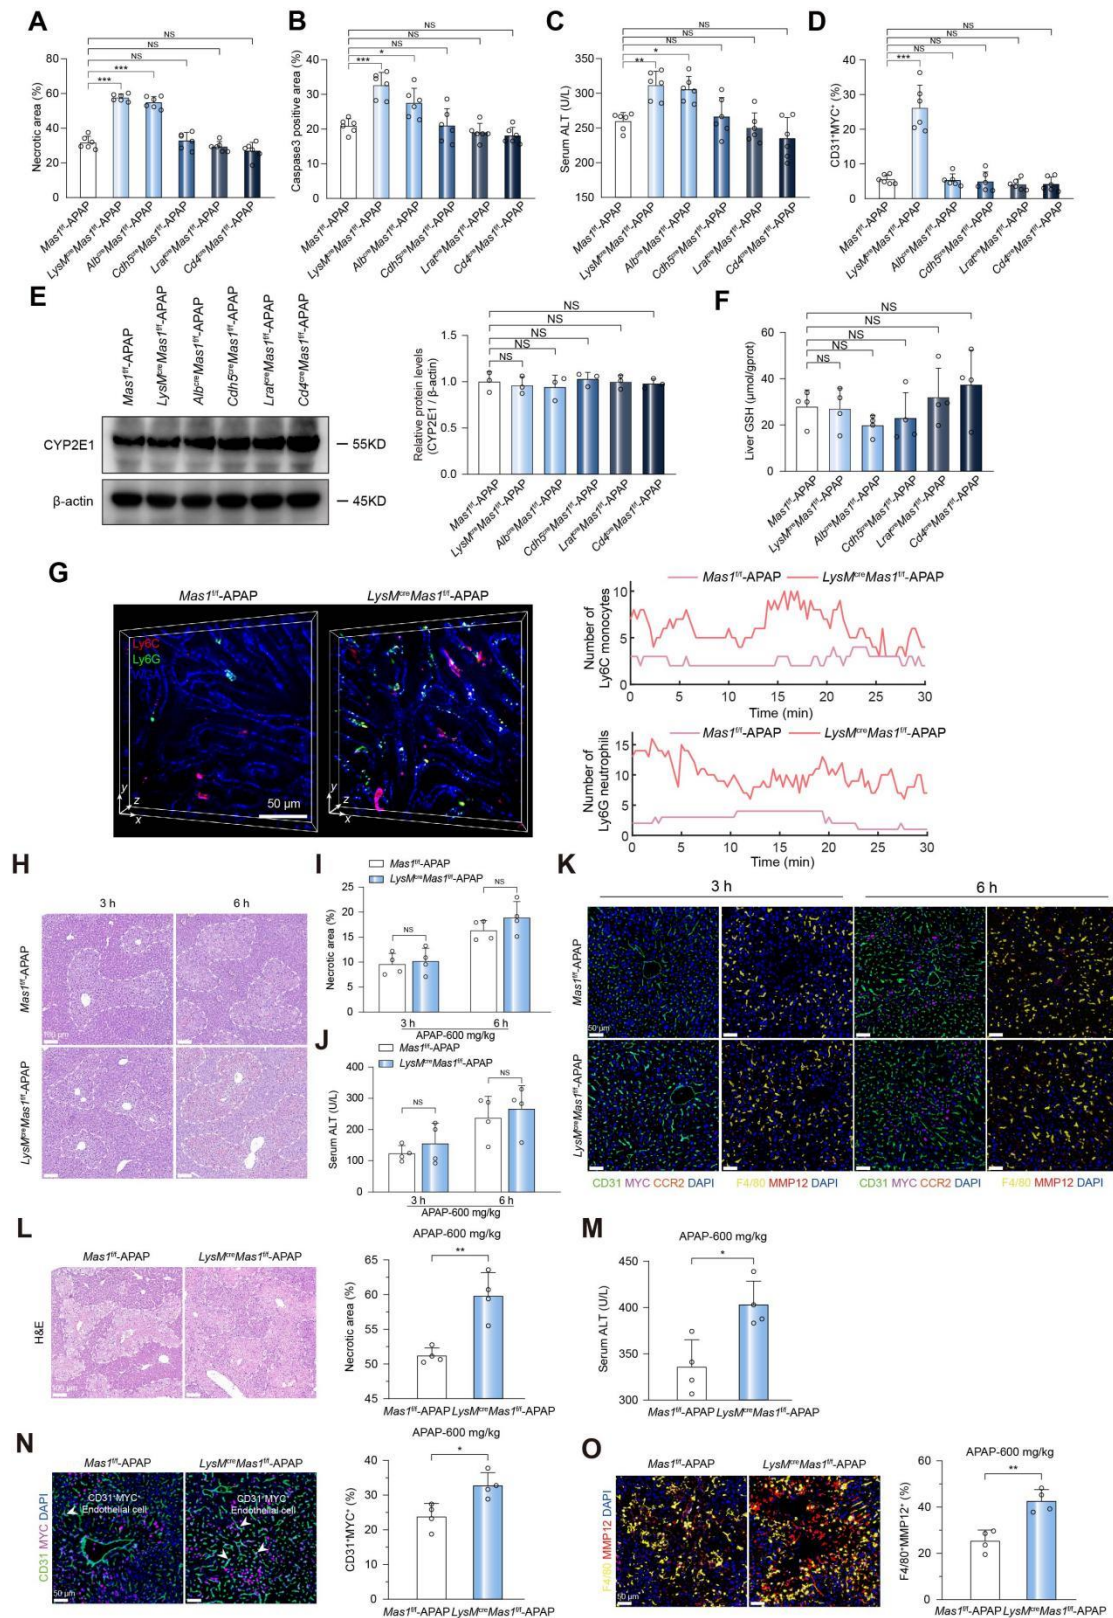

**Figure S14.** Myeloid *Mas1* deficiency exacerbates AILI. A) Quantification of necrotic area for H&E as shown in Figure 4A ( $n = 6$  mice per group; One-way ANOVA with Tukey's test,  $P = 6.61 \times 10^{-12}$ ,  $9.34 \times 10^{-11}$ ,  $9.93 \times 10^{-1}$ ,  $8.93 \times 10^{-1}$  and  $2.70 \times 10^{-1}$  from left to right). B) Quantification of caspase3 positive area for



mlHC as shown in Figure 4A ( $n = 6$  mice per group; One-way ANOVA with Tukey's test,  $P = 3.10 \times 10^{-5}$ ,  $2.87 \times 10^{-2}$ , 1.00,  $9.38 \times 10^{-1}$  and  $7.26 \times 10^{-1}$  from left to right). C) Serum ALT, a measure of hepatic injury ( $n = 6$  mice per group; One-way ANOVA with Tukey's test,  $P = 4.75 \times 10^{-3}$ ,  $1.49 \times 10^{-2}$ ,  $9.95 \times 10^{-1}$ ,  $9.74 \times 10^{-1}$  and  $4.32 \times 10^{-1}$  from left to right). D) Quantification of CD31<sup>+</sup>MYC<sup>+</sup> ECs for mlHC as shown in Figure 4A ( $n = 6$  mice per group; One-way ANOVA with Tukey's test,  $P = 6.33 \times 10^{-11}$ , 1.00,  $9.99 \times 10^{-1}$ ,  $9.69 \times 10^{-1}$  and  $9.79 \times 10^{-1}$  from left to right). E) Representative liver immunoblots and quantification of CYP2E1 and  $\beta$ -actin ( $n = 3$  mice per group; two-sided Student's t-test,  $P = 6.49 \times 10^{-1}$ ,  $5.82 \times 10^{-1}$ ,  $7.20 \times 10^{-1}$ ,  $9.81 \times 10^{-1}$  and  $7.79 \times 10^{-1}$  from left to right). F) Hepatic levels of GSH ( $n = 4$  mice per group; two-sided Student's t-test,  $P = 8.80 \times 10^{-1}$ ,  $1.07 \times 10^{-1}$ ,  $4.86 \times 10^{-1}$ ,  $5.96 \times 10^{-1}$  and  $2.98 \times 10^{-1}$  from left to right). G) Timelapse data of neutrophils (Ly6G) and monocytes (Ly6C) in the vessels (WGA) of living mouse livers were captured by DAOSLIMIT. Representative intravital images and the temporal traces of their number are shown. *Mas1<sup>fl/fl</sup>* and *LysM<sup>cre</sup>Mas1<sup>fl/fl</sup>* mice were challenged with APAP for 24 h. Scale bar: 50  $\mu$ m. In H-K, *Mas1<sup>fl/fl</sup>* and *LysM<sup>cre</sup>Mas1<sup>fl/fl</sup>* mice were administrated with APAP (600 mg kg<sup>-1</sup>) for 3 h or 6 h ( $n = 4$  mice per group). (H) Representative stainings of H&E are shown. Scale bar: 100  $\mu$ m. (I) Quantification of H&E are shown ( $n = 4$  mice per group; two-sided Student's t-test,  $P = 7.27 \times 10^{-1}$  and  $2.28 \times 10^{-1}$  from left to right). (J) Serum ALT ( $n = 4$  mice per group; two-sided Student's t-test,  $P = 4.15 \times 10^{-1}$  and  $5.91 \times 10^{-1}$  from left to right). (K) Representative stainings of CD31<sup>+</sup>MYC<sup>+</sup> ECs and F4/80<sup>+</sup>MMP12<sup>+</sup> M $\psi$  for mlHC ( $n = 4$  mice per group). Scale bar: 50  $\mu$ m. In L-O, *Mas1<sup>fl/fl</sup>* and *LysM<sup>cre</sup>Mas1<sup>fl/fl</sup>* mice were administrated with APAP (600 mg kg<sup>-1</sup>) for 24 h ( $n = 4$  mice per group). (L) Representative stainings and quantification of H&E are shown ( $n = 4$  mice per group; two-sided Student's t-test,  $P = 2.80 \times 10^{-3}$ ). Scale bar: 100  $\mu$ m. (M) Serum ALT ( $n = 4$  mice per group; two-sided Student's t-test,  $P = 1.31 \times 10^{-2}$ ). (N) Representative stainings and quantification of CD31<sup>+</sup>MYC<sup>+</sup> ECs for mlHC ( $n = 4$  mice per group; two-sided Student's t-test,  $P = 1.49 \times 10^{-2}$ ). Scale bar: 50  $\mu$ m.

(O) Representative stainings and quantification of F4/80<sup>+</sup>MMP12<sup>+</sup> M $\psi$  for mIHC ( $n = 4$  mice per group; two-sided Student's t-test,  $P = 2.29 \times 10^{-3}$ ). Scale bar: 50  $\mu\text{m}$ . In all graphs data are presented as mean  $\pm$  SD, \* $P < 0.05$ ; \*\* $P < 0.01$ ; \*\*\* $P < 0.001$ ; NS, non-significant. APAP, acetaminophen; mIHC, multiplex immunohistochemistry; ALT, alaninetransaminase.

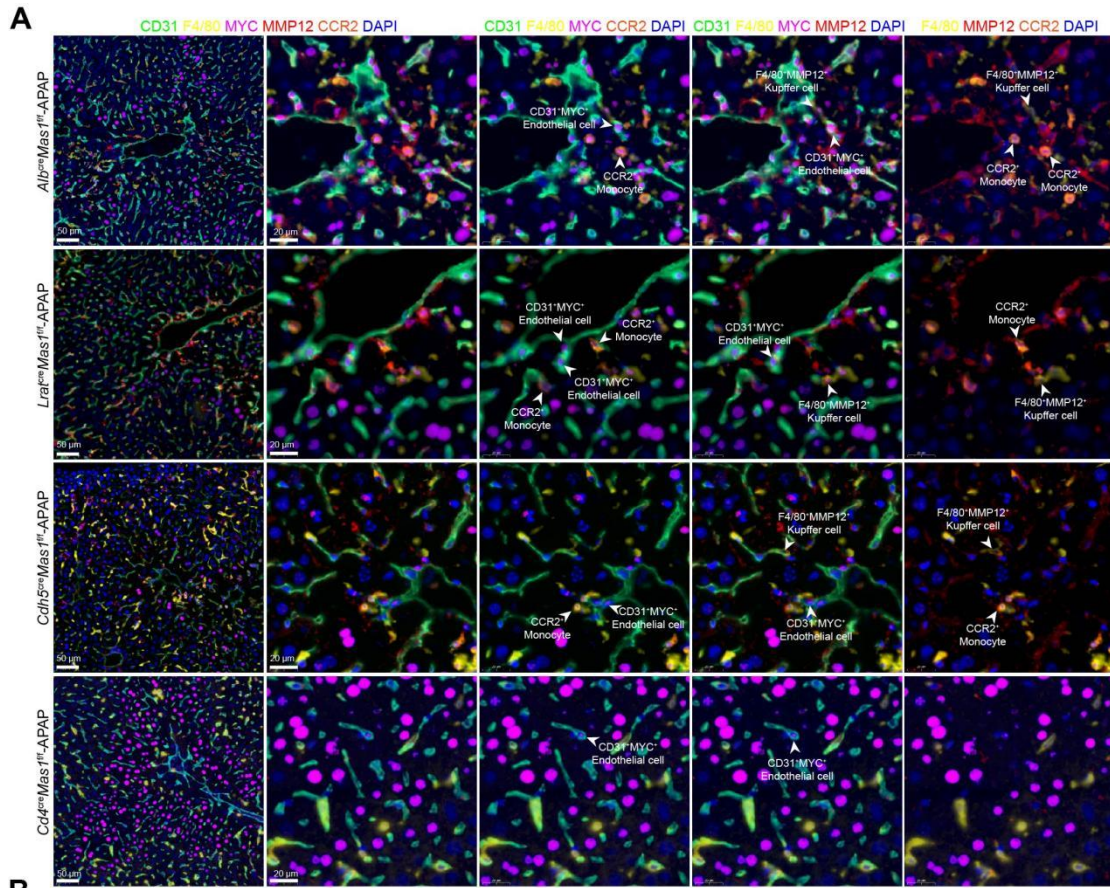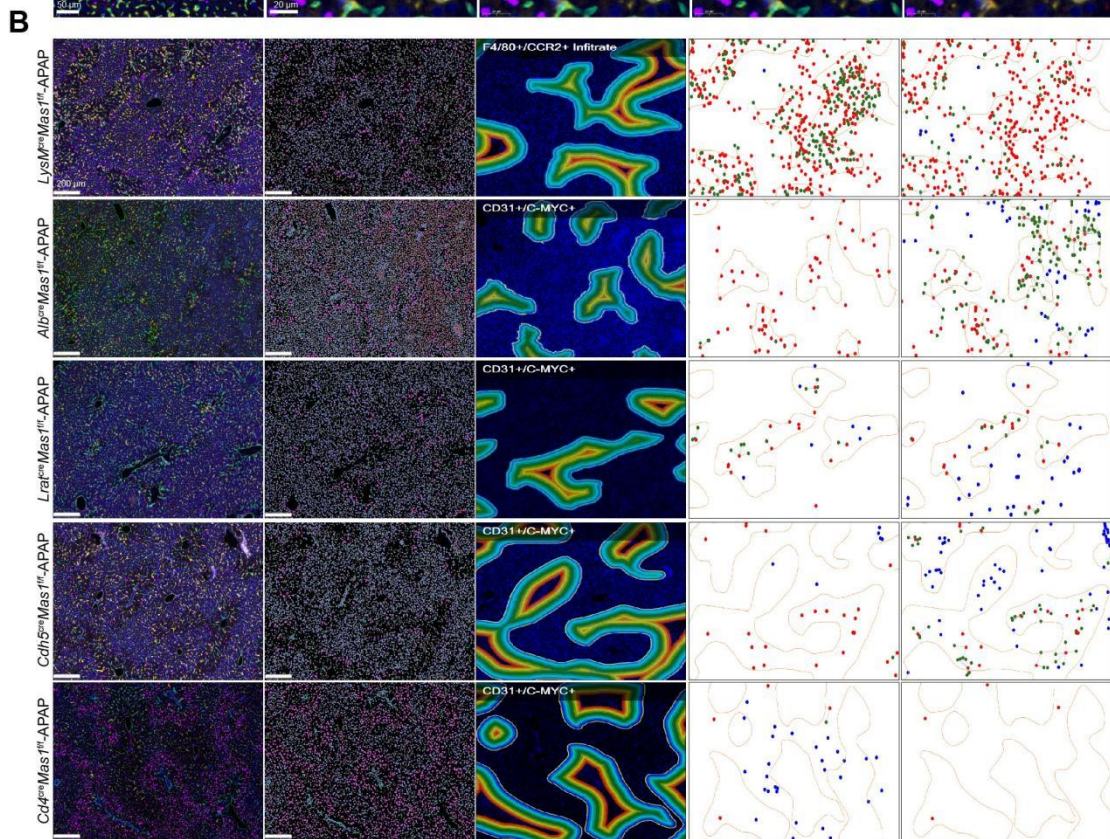

HALO analysis

- Layer
- Proximity line series
- [F4/80+CCR2+] = 1 > 100 μm
- [F4/80+CCR2+] = 1 ≤ 100 μm
- [CD31+MYC+] = 1
- Layer
- Proximity line series
- [F4/80+MMP12+] = 1 > 100 μm
- [F4/80+MMP12+] = 1 ≤ 100 μm
- [CD31+MYC+] = 1

**Figure S15.** Myeloid *Mas1* deficiency results in pro-inflammatory microenvironment in AILI. A-B) mIHC of CD31<sup>+</sup>MYC<sup>+</sup> ECs, F4/80<sup>+</sup>MMP12<sup>+</sup> M $\psi$  and CCR2<sup>+</sup> monocytes are shown. Scale bar: 50  $\mu$ m and 20  $\mu$ m. Spatial localization of CD31<sup>+</sup>MYC<sup>+</sup> ECs, CCR2<sup>+</sup> monocytes and F4/80<sup>+</sup>MMP12<sup>+</sup> M $\psi$  within injured region are shown. Scale bar: 200  $\mu$ m. APAP, acetaminophen.



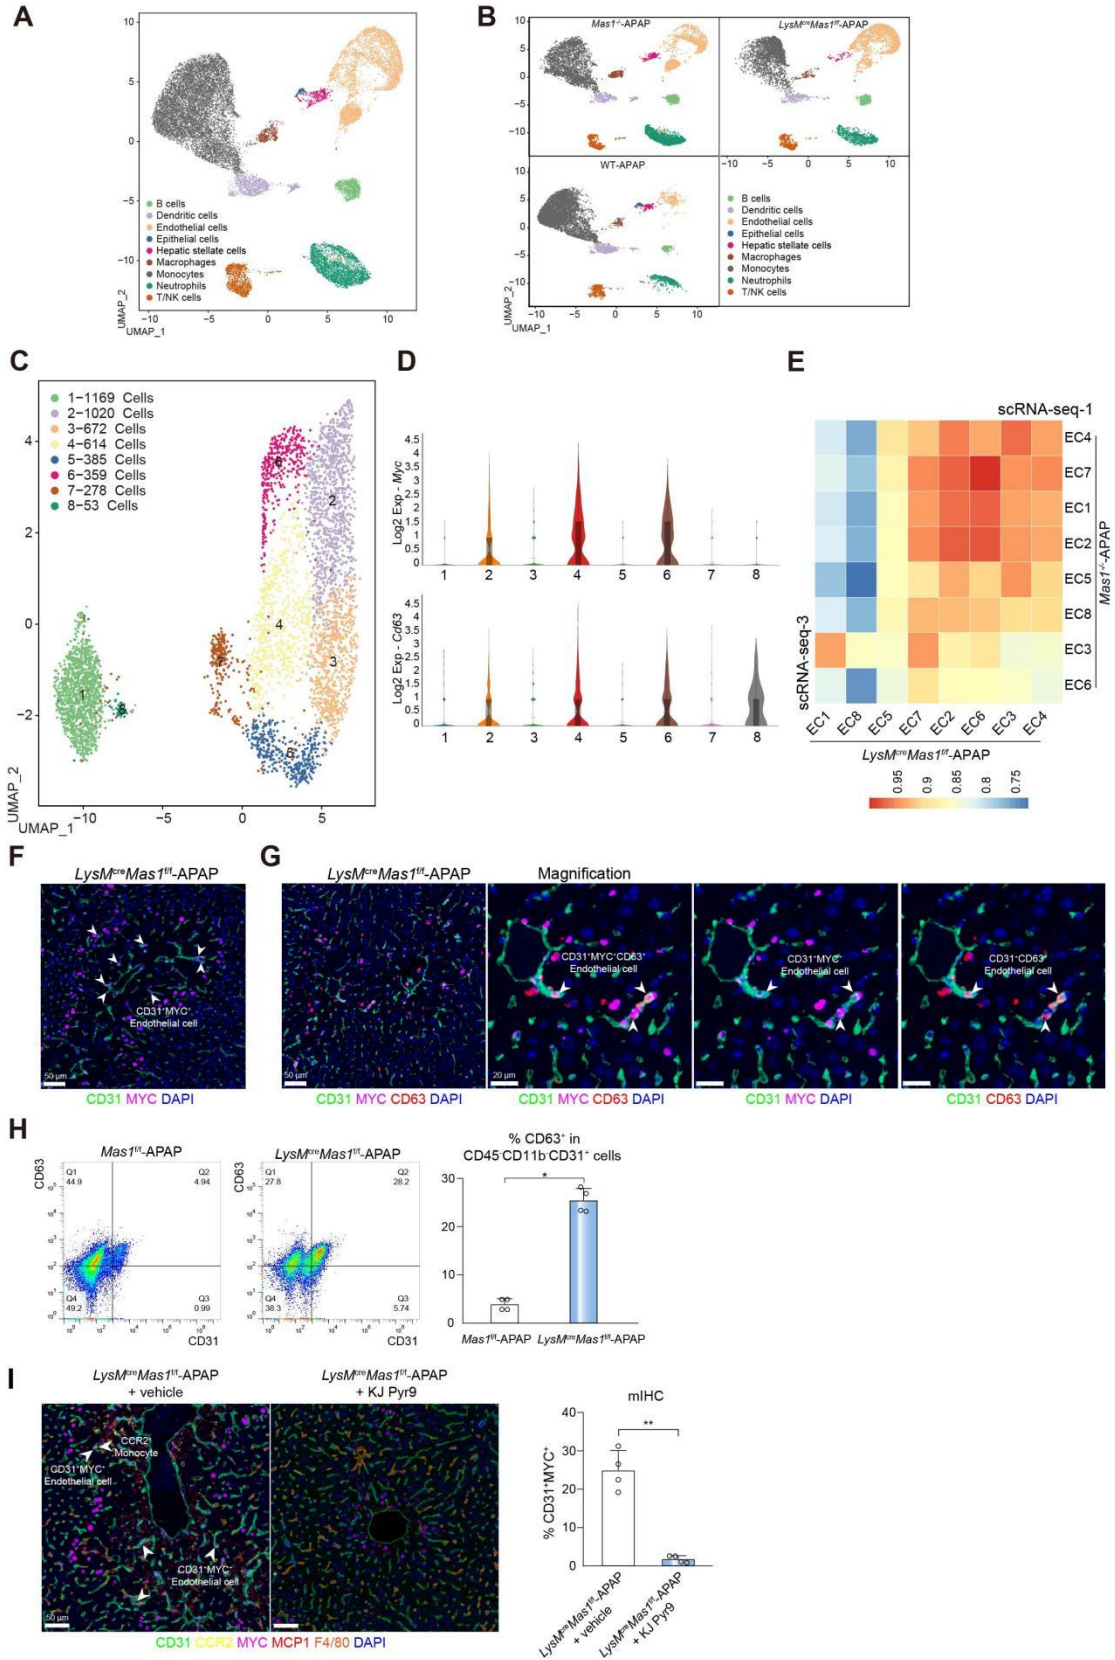

**Figure S16.** Myeloid *Mas1* deficiency induces the emergence of CD31<sup>+</sup>MYC<sup>+</sup>CD63<sup>+</sup> ECs in AILI. A) The UMAP plot of intrahepatic main cell

types. B) The UMAP plot showing the differences of intrahepatic main cell types between different groups. C) The UMAP plot of 4,550 single cells from ECs. D) Violin plots showing the marker genes of EC clusters. E) Correlation analysis of the scRNA-seq. F) mlHC of the CD31<sup>+</sup>MYC<sup>+</sup> ECs. Scale bar: 50  $\mu$ m. G) *LysM<sup>cre</sup>Mas1<sup>fl/fl</sup>* mice were challenged with APAP for 24 h ( $n = 4$  mice per group). mlHC of CD31<sup>+</sup>MYC<sup>+</sup>CD63<sup>+</sup> ECs are shown. Scale bar: 50  $\mu$ m and 20  $\mu$ m. H) *Mas1<sup>fl/fl</sup>* and *LysM<sup>cre</sup>Mas1<sup>fl/fl</sup>* mice were challenged with APAP for 24 h ( $n = 4$  mice per group). Representative flow cytometric plots of hepatic CD45<sup>-</sup>CD11b<sup>-</sup>CD31<sup>+</sup> cells showed CD63<sup>+</sup> fractions between groups. Quantification of CD63<sup>+</sup> fractions are shown ( $n = 4$  mice per group; two-sided Mann-Whitney U test,  $P = 2.86 \times 10^{-2}$ ). I) *LysM<sup>cre</sup>Mas1<sup>fl/fl</sup>* mice were administrated with or without KJ pyr9 2 h after APAP challenge ( $n = 4$  mice per group). mlHC of CD31<sup>+</sup>MYC<sup>+</sup> ECs and CCR2<sup>+</sup> monocytes are shown. Scale bar: 50  $\mu$ m. Quantification of the CD31<sup>+</sup>MYC<sup>+</sup> ECs for mlHC are shown ( $n = 4$  mice per group; two-sided Student's t-test,  $P = 2.48 \times 10^{-3}$ ). In all graphs data are presented as mean  $\pm$  SD, \* $P < 0.05$ ; \*\* $P < 0.01$ . UMAP, uniform manifold approximation and projection; Exp, expression; scRNA-seq, single-cell RNA sequencing; EC, endothelial cell; APAP, acetaminophen.



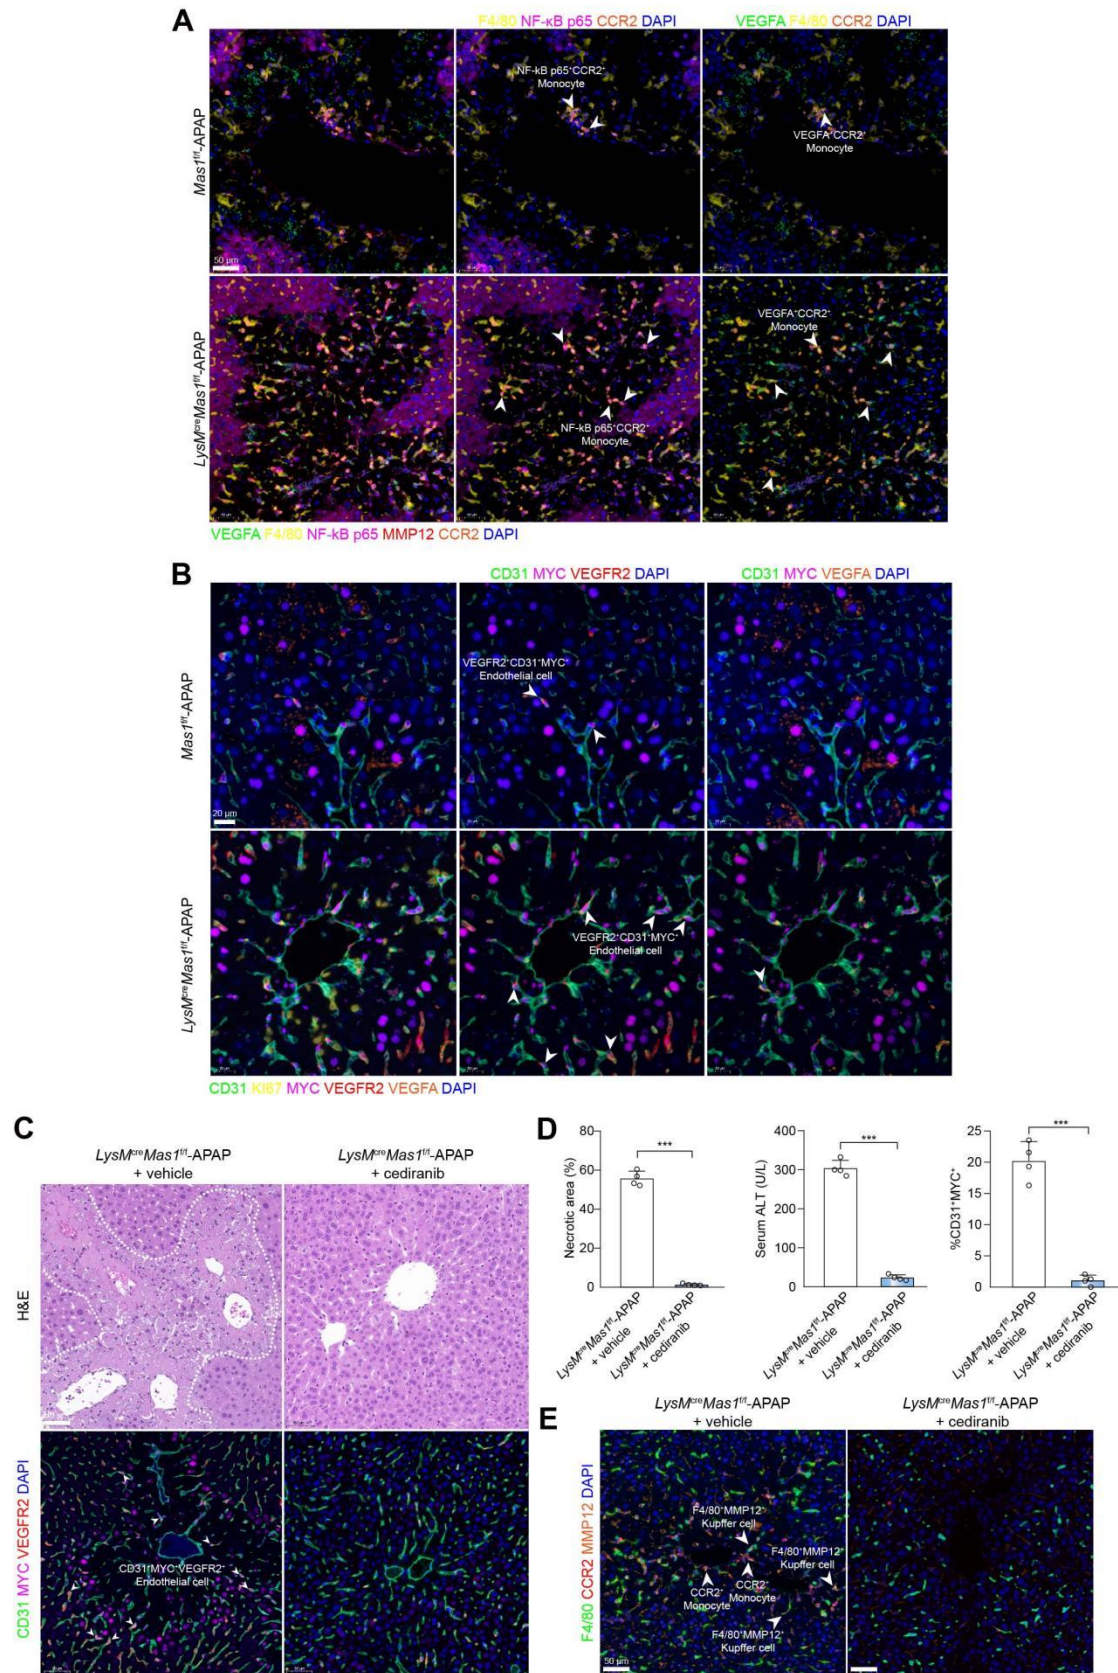

**Figure S17.** Pro-inflammatory monocytes induce the CD31<sup>+</sup>MYC<sup>+</sup>CD63<sup>+</sup> EC Subgroup proliferation. In A-B, *Mas1<sup>ff</sup>* and *LysM<sup>cre</sup>Mas1<sup>ff</sup>* mice were

administrated with APAP for 24 h ( $n = 4$  mice per group). A) mlHC of NF- $\kappa$ B p65<sup>+</sup>VEGFA<sup>+</sup>CCR2<sup>+</sup> monocytes. Scale bar: 50  $\mu$ m. B) mlHC of VEGFR2<sup>+</sup>CD31<sup>+</sup>MYC<sup>+</sup> ECs. Scale bar: 20  $\mu$ m. In C-E, *LysM<sup>cre</sup>Mas1<sup>fl/fl</sup>* mice were pre-administrated with or without cediranib for 2 h before APAP challenge ( $n = 4$  mice per group). C) Representative stainings of H&E and mlHC are shown. Scale bar: 50  $\mu$ m. D) Quantification of necrotic area for H&E as shown in C ( $n = 4$  mice per group; two-sided Student's t-test,  $P = 7.10 \times 10^{-5}$ ). Serum ALT, a measure of hepatic injury ( $n = 4$  mice per group; two-sided Student's t-test,  $P = 2.16 \times 10^{-7}$ ). Quantification of CD31<sup>+</sup>MYC<sup>+</sup> ECs for mlHC as shown in C ( $n = 4$  mice per group; two-sided Student's t-test,  $P = 2.20 \times 10^{-5}$ ). E) mlHC of F4/80<sup>+</sup>MMP12<sup>+</sup> M $\psi$  and CCR2<sup>+</sup> monocytes. Scale bar: 50  $\mu$ m. In all graphs data are presented as mean  $\pm$  SD, \*\*\* $P < 0.001$ . APAP, acetaminophen; NF- $\kappa$ B, nuclear factor kappa B; H&E, hematoxylin-eosin; ALT, alaninetransaminase; mlHC, multiplex immunohistochemistry.

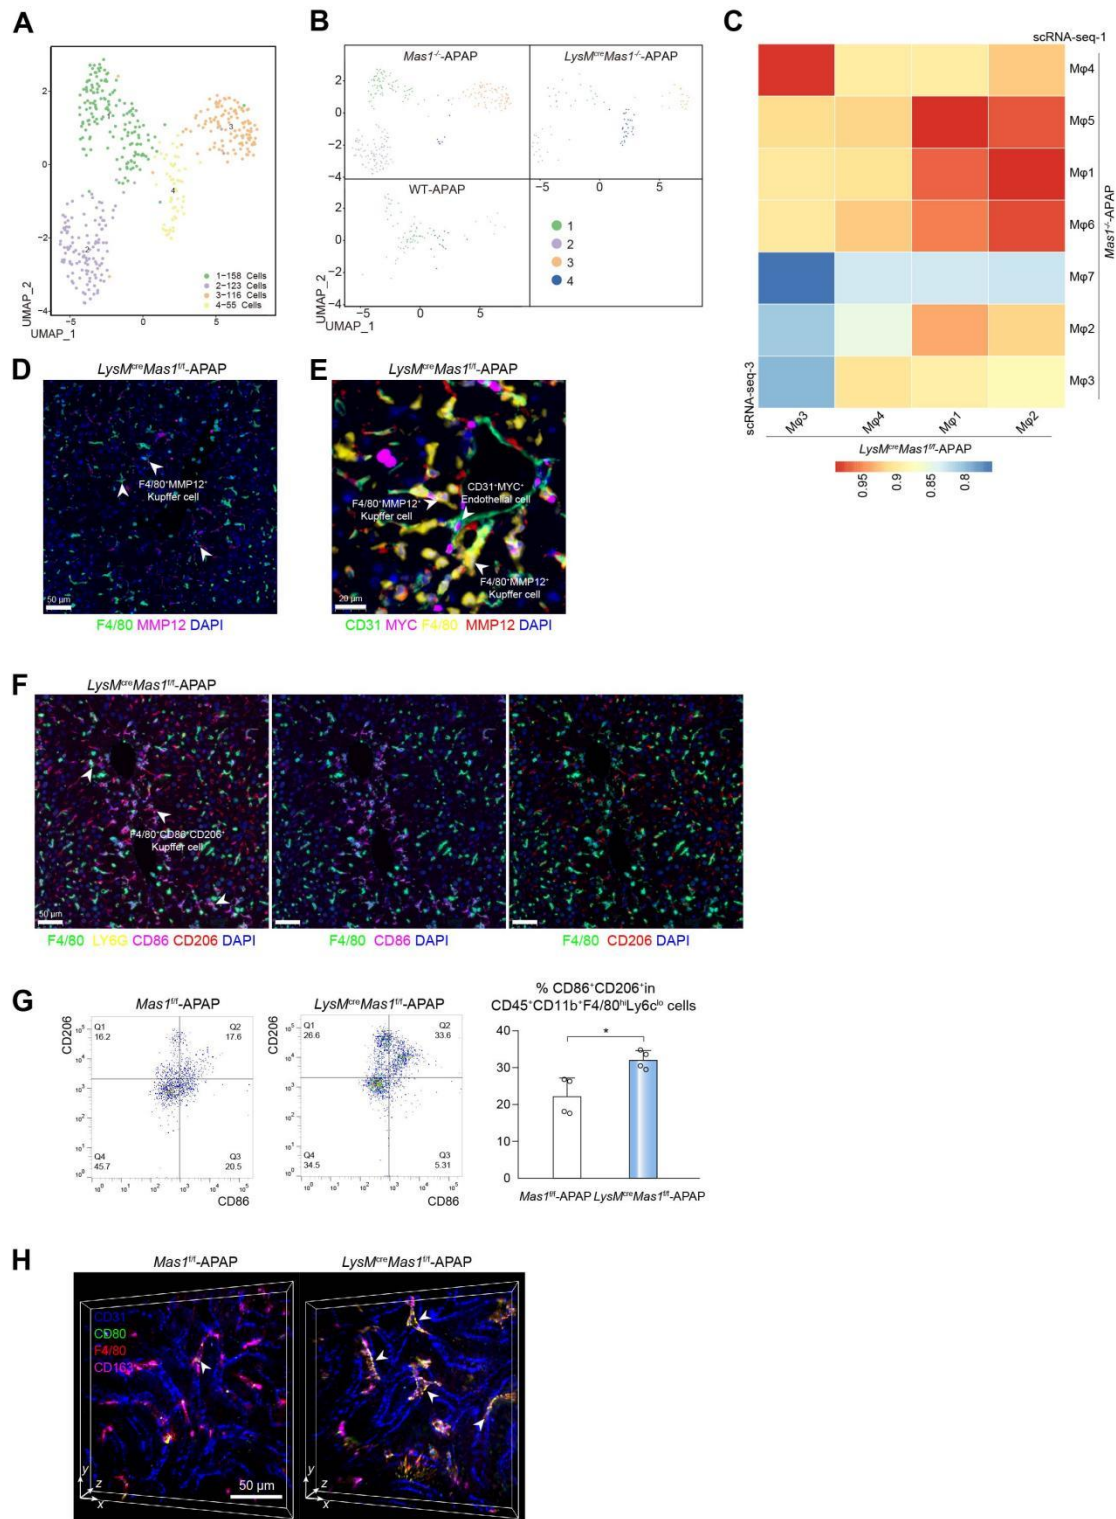

**Figure S18.** EC-secreting lactate induces M $\phi$  polarization. A) The UMAP plot showing the subpopulations of M $\phi$ . B) The UMAP plot showing the differences of M $\phi$  subpopulations between different groups. C) Correlation analysis of the scRNA-seq. In D-F, *LysM<sup>cre</sup>Mas1<sup>fl/fl</sup>* mice were administrated with APAP for 24 h ( $n = 4$  mice per group). D) mIHC of the F4/80<sup>+</sup>MMP12<sup>+</sup> M $\phi$  is shown. Scale bar:



50  $\mu\text{m}$ . E) mlHC of the CD31<sup>+</sup>MYC<sup>+</sup> ECs and F4/80<sup>+</sup>MMP12<sup>+</sup> M $\phi$ . Scale bar: 20  $\mu\text{m}$ . F) mlHC of the M $\phi$  polarization (F4/80<sup>+</sup>CD86<sup>+</sup>CD206<sup>+</sup> M $\phi$ ). Scale bar: 50  $\mu\text{m}$ . G) Representative flow cytometric plots of hepatic CD45<sup>+</sup>CD11b<sup>+</sup>F4/80<sup>high</sup>Ly6C<sup>low</sup> cells showed the CD86<sup>+</sup>CD206<sup>+</sup> fractions between groups ( $n = 4$  mice per group; two-sided Student's t-test,  $P = 2.08 \times 10^{-2}$ ). H) Representative intravital images of M $\phi$  polarization by DAOSLIMIT. The white arrows represent the CD80<sup>+</sup>CD163<sup>+</sup> M $\phi$ . Scale bar: 50  $\mu\text{m}$ . In all graphs data are presented as mean  $\pm$  SD,  $*P < 0.05$ . UMAP, uniform manifold approximation and projection; APAP, acetaminophen; scRNA-seq, single-cell RNA sequencing; M $\phi$ , macrophages.

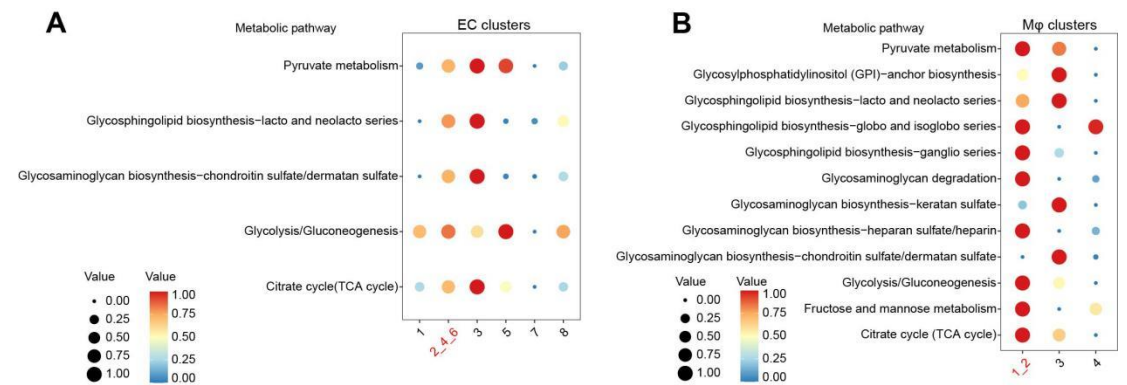

**Figure S19.** EC-secreting lactate induces M $\phi$  glycolysis. A) Pathway enrichment analysis of highly expressed genes for EC clusters. KEGG gene sets were used to perform the pathway enrichment analysis (Methods). B) Pathway enrichment analysis of highly expressed genes for M $\phi$  clusters. KEGG gene sets were used to perform the pathway enrichment analysis (Methods). In all graphs data are presented as mean  $\pm$  SD. EC, endothelial cell; M $\phi$ , macrophages.

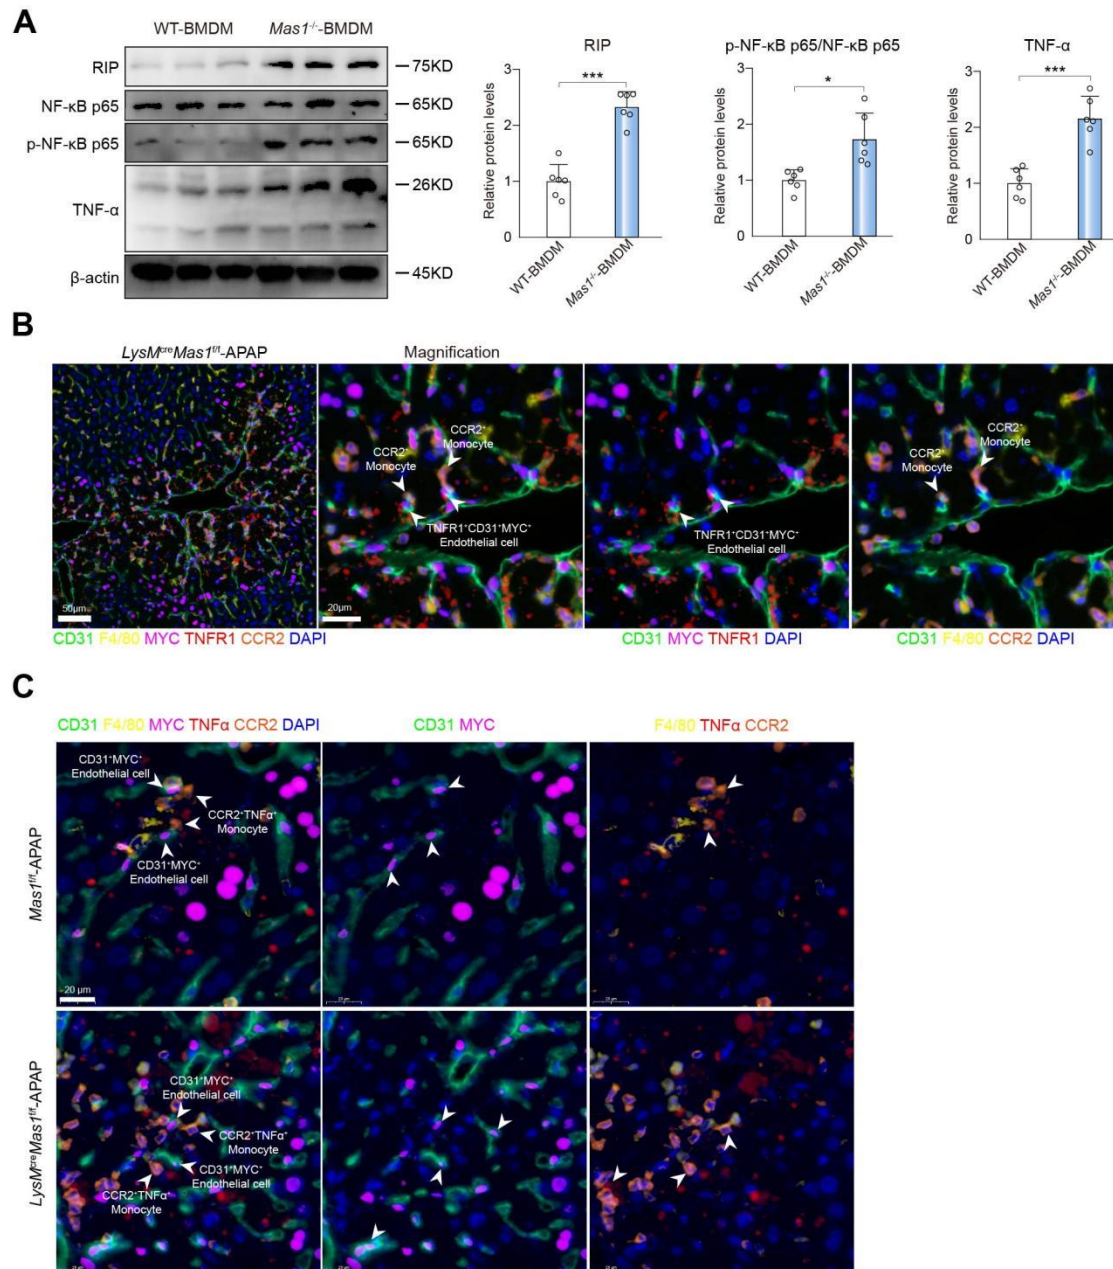

**Figure S20.** Myeloid *Mas1* deficiency induces the emergence of CD31<sup>+</sup>MYC<sup>+</sup>CD63<sup>+</sup> ECs in AILI via NF-κB/TNF-α pathway. A) Representative immunoblots with quantification ( $n = 6$  samples per group; two-sided Student's  $t$ -test,  $P = 1.20 \times 10^{-5}$ ,  $1.03 \times 10^{-2}$  and  $1.38 \times 10^{-4}$  from left to right). WT and *Mas1*<sup>-/-</sup> BMDMs were stimulated with LPS ( $100 \text{ ng ml}^{-1}$ ) for 12 h to drive proinflammatory activation. B) mIHC of CD31<sup>+</sup>MYC<sup>+</sup>TNFR1<sup>+</sup> ECs and CCR2<sup>+</sup> monocytes are shown. Scale bar: 50  $\mu\text{m}$  and 20  $\mu\text{m}$ . *LysM*<sup>cre</sup>*Mas1*<sup>fl/fl</sup> mice were challenged with APAP for 24 h ( $n = 4$  mice per group). C) mIHC of CD31<sup>+</sup>MYC<sup>+</sup> ECs and CCR2<sup>+</sup>TNF-α<sup>+</sup> monocytes are shown. Scale bar: 20  $\mu\text{m}$ . *Mas1*<sup>fl/fl</sup> and



*LysM<sup>cre</sup>Mas1<sup>fl/fl</sup>* mice were challenged with APAP for 24 h (*n* = 4 mice per group).  
BMDM, bone marrow derived macrophages; TNF- $\alpha$ , tumor necrosis factor- $\alpha$ ;  
NF- $\kappa$ B, nuclear factor kappa B; APAP, acetaminophen.

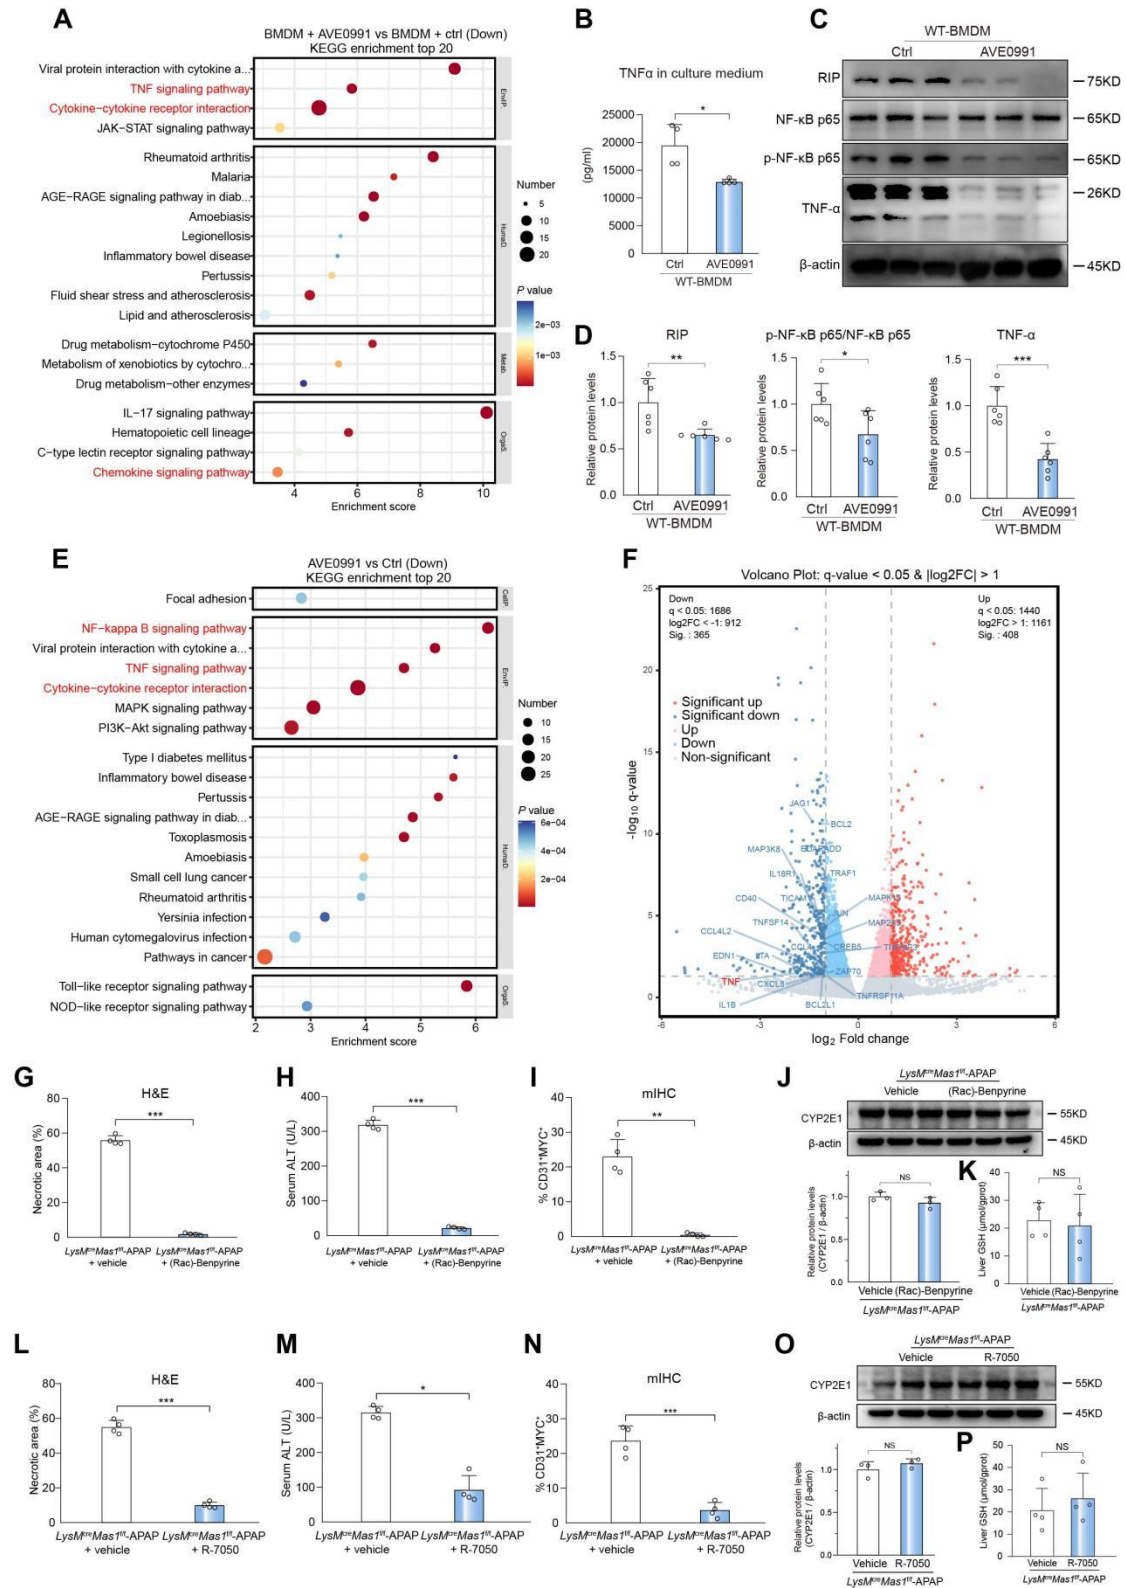

**Figure S21.** Activation of Mas could significantly inhibit NF- $\kappa$ B/TNF- $\alpha$  pathway. In A-D, BMDMs from WT mice were pre-administrated with or without AVE0991 (5  $\mu$ M) for 2 h before stimulated with LPS (100 ng ml<sup>-1</sup>) for 12 h. A) BMDMs were subjected to bulk RNA-seq ( $n = 3$  samples per group). KEGG

pathway enrichment analysis show that activation of Mas could significantly down-regulate TNF signaling pathway. B) The TNF- $\alpha$  of the culture medium were tested ( $n = 4$  samples per group; two-sided Student's t-test,  $P = 3.91 \times 10^{-2}$ ). C-D) Representative immunoblots with quantification ( $n = 6$  samples per group; two-sided Student's t-test and two-sided Mann-Whitney U test,  $P = 4.33 \times 10^{-3}$ ,  $4.08 \times 10^{-2}$  and  $3.68 \times 10^{-4}$  from left to right). In E-F, monocytes (CD14<sup>+</sup> cells) isolated from human peripheral blood were stimulated with LPS (100 ng ml<sup>-1</sup>) for pro-inflammatory activation with or without AVE0991 (10  $\mu$ M) administration and then subjected to bulk RNA-seq ( $n = 3$  samples per group). E) KEGG pathway enrichment analysis show that activation of Mas could significantly down-regulate NF- $\kappa$ B and TNF signaling pathway. F) Volcano plot showing the differentially expressed genes for TNF signaling pathway and NF-kappa B signaling pathway. G) Quantification of necrotic area for H&E as shown in Figure 5G ( $n = 4$  mice per group; two-sided Student's t-test,  $P = 1.68 \times 10^{-8}$ ). H) Serum ALT, a measure of hepatic injury ( $n = 4$  mice per group; two-sided Student's t-test,  $P = 1.24 \times 10^{-8}$ ). I) Quantification of CD31<sup>+</sup>MYC<sup>+</sup> ECs for mIHC as shown in Figure 5G ( $n = 4$  mice per group; two-sided Student's t-test,  $P = 2.58 \times 10^{-3}$ ). J) Representative liver immunoblots and quantification of CYP2E1 and  $\beta$ -actin ( $n = 3$  mice per group; two-sided Student's t-test,  $P = 2.00 \times 10^{-1}$ ). K) Hepatic levels of GSH ( $n = 4$  mice per group, two-sided Student's t-test,  $P = 7.79 \times 10^{-1}$ ). L) Quantification of necrotic area for H&E as shown in Figure 5H ( $n = 4$  mice per group; two-sided Student's t-test,  $P = 6.84 \times 10^{-7}$ ). M) Serum ALT, a measure of hepatic injury ( $n = 4$  mice per group; two-sided Mann-Whitney U test,  $P = 2.86 \times 10^{-2}$ ). N) Quantification of CD31<sup>+</sup>MYC<sup>+</sup> ECs for mIHC as shown in Figure 5H ( $n = 4$  mice per group; two-sided Student's t-test,  $P = 1.64 \times 10^{-4}$ ). O) Representative liver immunoblots and quantification of CYP2E1 and  $\beta$ -actin ( $n = 3$  mice per group; two-sided Student's t-test,  $P = 3.01 \times 10^{-1}$ ). P) Hepatic levels of GSH ( $n = 4$  mice per group, two-sided Student's t-test,  $P = 5.05 \times 10^{-1}$ ). In all graphs data are presented as mean  $\pm$  SD, \* $P < 0.05$ ; \*\* $P < 0.01$ ; \*\*\* $P < 0.001$ , NS, not significant. BMDM,

bone marrow derived macrophages; KEGG, kyoto encyclopedia of genes and genomes; TNF- $\alpha$ , tumor necrosis factor- $\alpha$ ; NF- $\kappa$ B, nuclear factor kappa B; FC, fold change; ALT, alaninetransaminase; mIHC, multiplex immunohistochemistry.

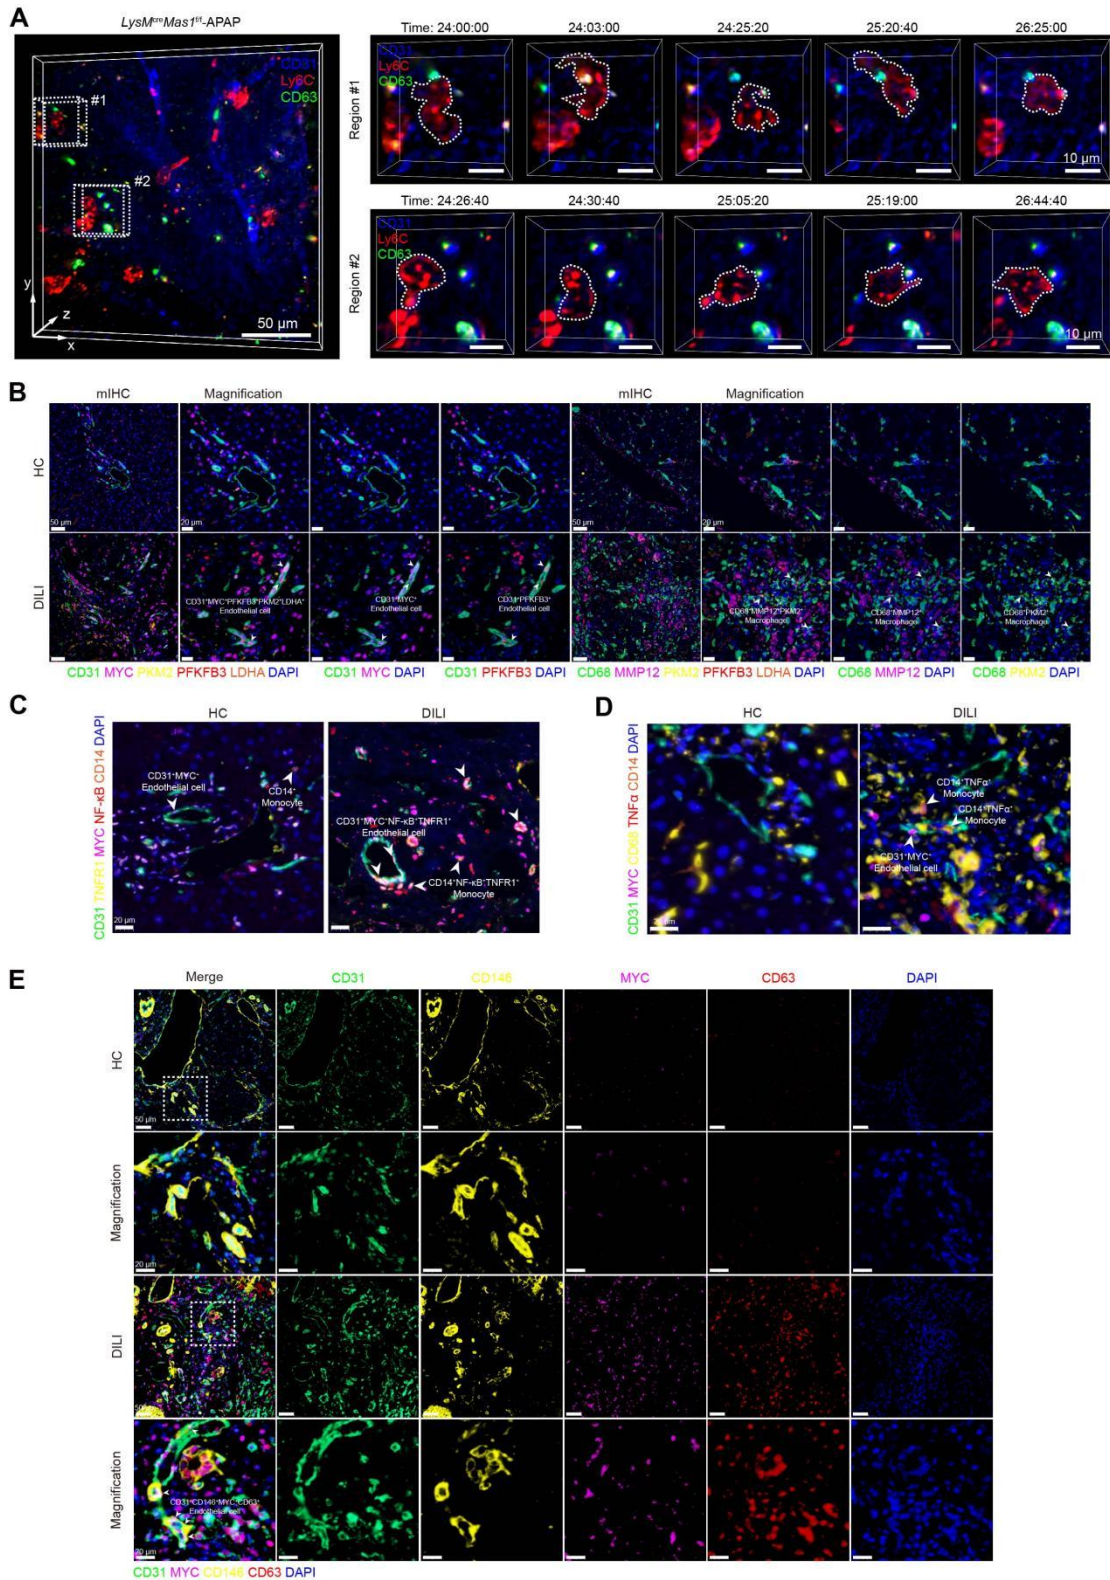

**Figure S22.** Pro-inflammatory microenvironment were observed by hour-long intravital 3D imaging in mice and enriched in advanced human DILI. A) Timelapse data captured by DAOSLIMIT showing the interactions between monocytes and CD63<sup>+</sup> ECs in *LysM<sup>cre</sup>Mas1<sup>ff</sup>-APAP* mouse. Scale bar: 50  $\mu$ m.



B) mlHC of CD31<sup>+</sup>MYC<sup>+</sup> ECs, CD68<sup>+</sup>MMP12<sup>+</sup> M $\psi$  and key glycolytic enzymes are shown. Scale bar: 50  $\mu$ m and 20  $\mu$ m. C) mlHC of CD31<sup>+</sup>MYC<sup>+</sup>NF- $\kappa$ B<sup>+</sup>TNFR1<sup>+</sup> ECs and CD14<sup>+</sup>NF- $\kappa$ B<sup>+</sup>TNFR1<sup>+</sup> monocytes are shown. Scale bar: 20  $\mu$ m. D) mlHC of CD31<sup>+</sup>MYC<sup>+</sup> ECs and CD14<sup>+</sup>TNF $\alpha$ <sup>+</sup> monocytes are shown. Scale bar: 20  $\mu$ m. E) mlHC of CD31<sup>+</sup>MYC<sup>+</sup>CD146<sup>+</sup>CD63<sup>+</sup> ECs are shown. Scale bar: 50  $\mu$ m and 20  $\mu$ m. APAP, acetaminophen; mlHC, multiplex immunohistochemistry; HC, healthy control; DILI, drug-induced liver injury; NF- $\kappa$ B, nuclear factor kappa B; TNF- $\alpha$ , tumor necrosis factor- $\alpha$ .

**A**

Ground truth (Label)

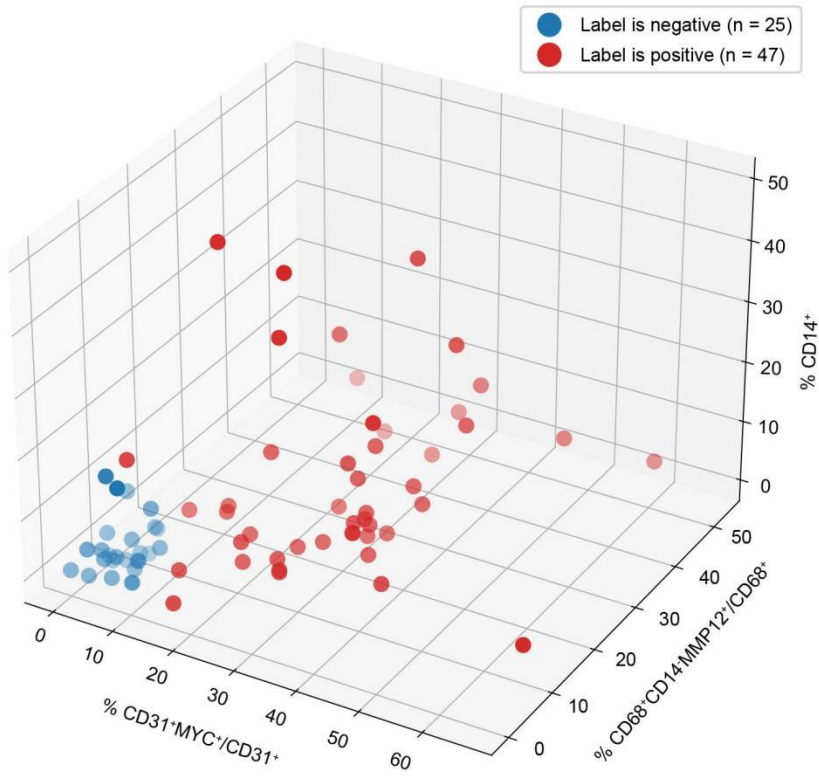

**B**

Prediction using k-means clustering

(Accuracy = 83.33%)

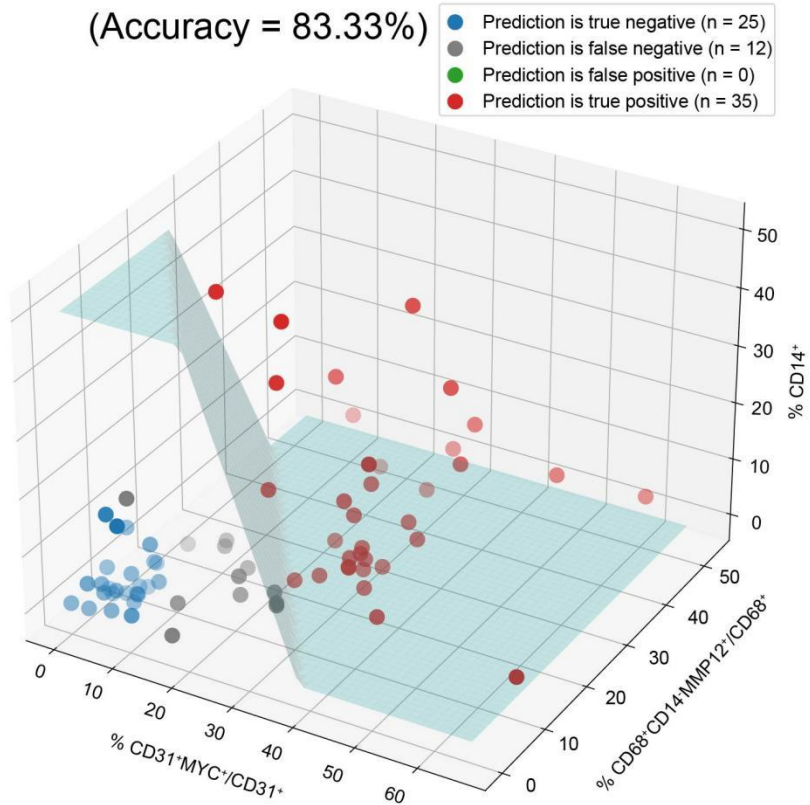

**Figure S23.** Pro-inflammatory microenvironment were enriched in advanced human DILI. A) Microenvironmental cell frequency data of human DILI were plotted in a three-dimensional space ( $n = 10$  with CHB, 5 with ALD, 5 with AIH, 5 with PBC and 47 with DILI). B) The k-means algorithm was applied to conduct an unsupervised clustering, and the prediction accuracy rate reached 83.33%. Detailed prediction model can be found in the Experimental Section.

## Supplementary tables

**Table S1. Detailed information of *in vivo* drug administrations.**

| Name                 | Function                   | Dose                         | Frequency   | Time point <sup>a)</sup>                     | Mode            | Solvent                                                    | Control group     |
|----------------------|----------------------------|------------------------------|-------------|----------------------------------------------|-----------------|------------------------------------------------------------|-------------------|
| AVE0991              | Mas receptor agonist       | 1.16 [nmol g <sup>-1</sup> ] | One time    | 2 h before                                   | Intraperitoneal | 10% DMSO and 90% corn oil                                  | Solvent           |
| KJ Pyr9              | MYC inhibitor              | 25 [mg kg <sup>-1</sup> ]    | One time    | 2 h after                                    | Intraperitoneal | DMSO: Tween 80: 5% dextrose = 1: 1: 8 by volume            | Solvent           |
| 3PO                  | PFKFB3 inhibitor           | 50 [mg kg <sup>-1</sup> ]    | Three times | ① 16 h before<br>② 2 h after<br>③ 10 h after | Intraperitoneal | DMSO: PEG 300: Tween 80: Saline = 1: 4: 0.5: 4.5 by volume | Solvent           |
| Clodronate liposomes | Macrophage depletion       | 8 [ml kg <sup>-1</sup> ]     | One time    | 24 h before                                  | Intravenous     | /                                                          | Control liposomes |
| Cenicriviroc         | Dual CCR2/C CR5 antagonist | 100 [mg kg <sup>-1</sup> ]   | One time    | 2 h before                                   | Intragastric    | DMSO: Tween 80: 5% dextro                                  | Solvent           |

|                     |                            |                                    |                |                                                                     |                     |                                                                                                |         |
|---------------------|----------------------------|------------------------------------|----------------|---------------------------------------------------------------------|---------------------|------------------------------------------------------------------------------------------------|---------|
|                     |                            |                                    |                |                                                                     |                     | se =<br>1: 1: 8<br>by<br>volum<br>e                                                            |         |
| Cediranib           | VEGFR<br>inhibitor         | 6<br>[mg<br>kg <sup>-1</sup><br>]  | Three<br>times | ① 18 h<br>befo<br>re<br>② 2<br>h<br>befo<br>re<br>③ 5<br>h<br>after | Intragastric        | DMS<br>O:<br>Twee<br>n 80:<br>5%<br>dextro<br>se =<br>1: 1: 8<br>by<br>volum<br>e              | Solvent |
| (Rac)-Benp<br>yrine | TNF- $\alpha$<br>inhibitor | 30<br>[mg<br>kg <sup>-1</sup><br>] | Two<br>times   | ① 2<br>h<br>befo<br>re<br>② 4<br>h<br>after                         | Intragastric        | DMS<br>O:<br>PEG<br>300:<br>Twee<br>n 80:<br>Saline<br>= 1: 4:<br>0.5:<br>4.5 by<br>volum<br>e | Solvent |
| R-7050              | TNFR<br>antagoni<br>st     | 10<br>[mg<br>kg <sup>-1</sup><br>] | One<br>time    | 2 h<br>befo<br>re                                                   | Intraperito<br>neal | DMS<br>O:<br>PEG<br>300:<br>Twee<br>n 80:<br>Saline<br>= 1: 4:<br>0.5:<br>4.5 by<br>volum<br>e | Solvent |

a) APAP administration was used as reference.

Abbreviations: VEGFR, vascular endothelial growth factor receptor; TNFR, tumor necrosis factor receptor; CCR, chemokine receptor.



**Table S2. Demographic and clinical features of patients and HCs providing liver samples.**

|                   | DILI<br>(n = 47) | HBV<br>(n = 10) | ALD<br>(n = 5) | NAFLD<br>(n = 5) | AIH<br>(n = 5) | PBC<br>(n = 5) | HC<br>(n = 14) |
|-------------------|------------------|-----------------|----------------|------------------|----------------|----------------|----------------|
| Age               | 42.3 ±           | 49.4 ±          | 44.8 ±         | 37.8 ±           | 50.4 ±         | 54.8 ±         | 33.6 ±         |
| [years]           | 15.4             | 9.4             | 10.8           | 4.0              | 9.2            | 7.0            | 5.0            |
| Gender            | 23/24            | 1/9             | 5/0            | 2/3              | 4/1            | 4/1            | 9/5            |
| [F/M]             |                  |                 |                |                  |                |                |                |
| ALT [U            | 364.9 ±          | 38.0 ±          | 39.0 ±         | 52.6 ±           | 55.2 ±         | 39.8 ±         | 25.3 ±         |
| L <sup>-1</sup> ] | 461.1            | 40.1            | 22.8           | 29.5             | 72.6           | 25.5           | 15.7           |
| AST [U            | 381.0 ±          | 53.4 ±          | 42.2 ±         | 35.8 ±           | 98.0 ±         | 68.8 ±         | 18.0 ±         |
| L <sup>-1</sup> ] | 636.7            | 48.1            | 20.2           | 15.7             | 139.2          | 41.6           | 5.7            |
| ALP [U            | 122.4 ±          | 135.3 ±         | 168.6 ±        | 76.6 ±           | 85.0 ±         | 237.6 ±        | 87.4 ±         |
| L <sup>-1</sup> ] | 95.4             | 70.5            | 71.2           | 9.4              | 37.0           | 169.5          | 28.1           |
| γ-GT [U           | 78.3 ±           | 61.7 ±          | 21.4 ±         | 31.8 ±           | 36.8 ±         | 81.6 ±         | 28.9 ±         |
| L <sup>-1</sup> ] | 110.5            | 52.9            | 4.5            | 19.3             | 21.0           | 65.7           | 45.4           |
| TBIL              | 376.5 ±          | 98.3 ±          | 280.9 ±        | 6.2 ±            | 221.0 ±        | 172.9 ±        | 9.4 ±          |
| [μmol             | 244.9            | 186.0           | 218.7          | 1.7              | 201.8          | 146.5          | 4.1            |
| L <sup>-1</sup> ] |                  |                 |                |                  |                |                |                |
| DBIL              | 246.8 ±          | 56.4 ±          | 143.1 ±        | 2.9 ±            | 122.9 ±        | 168.5 ±        | 2.6 ±          |
| [μmol             | 162.3            | 124.3           | 155.7          | 1.4              | 119.6          | 115.0          | 1.3            |
| L <sup>-1</sup> ] |                  |                 |                |                  |                |                |                |
| PT [s]            | 33.3 ±           | 17.1 ±          | 25.0 ±         | 10.5 ±           | 23.6 ±         | 17.1 ±         | 10.9 ±         |
|                   | 32.5             | 4.5             | 2.4            | 0.6              | 8.8            | 2.6            | 0.5            |

|     |       |       |       |       |       |       |       |
|-----|-------|-------|-------|-------|-------|-------|-------|
| INR | 2.8 ± | 1.6 ± | 2.4 ± | 0.9 ± | 2.2 ± | 1.6 ± | 0.9 ± |
|     | 2.2   | 0.5   | 0.2   | 0.1   | 0.9   | 0.2   | 0.1   |

Abbreviations: F/M, Female and Male; ALT, alanine transaminase; AST, aspartate aminotransferase; ALP, alkaline phosphatase;  $\gamma$ -GT,  $\gamma$ -glutamyl transferase; TBIL, total bilirubin; DBIL, direct bilirubin; PT, prothrombin time; INR, international normalized ratio.
